# Supplementary material for: Sea cucumber genome provides insights into saponin biosynthesis and aestivation regulation
Source: PubMed Central journal article supplement (PMC6018497; doi:10.1038/s41421-018-0030-5), 2018-06-26
Supplement: 41421_2018_30_MOESM1_ESM.pdf [file 41421_2018_30_MOESM1_ESM.pdf]

## **Supplementary Materials for**

### **Sea cucumber genome provides insights into saponin biosynthesis and aestivation regulation**

**This PDF file includes:**

#### **Supplementary Figures**

Figures S1 to S24

#### **Supplementary Tables**

Tables S1 to S4, S6 to S13, S15, S17, S19, S20, S22-S29, S31, S33-S36

#### **References (1-7)**

**Other Supplementary Materials for this manuscript include the following:**

Table S5, S14, S16, S18, S21, S30, S32, S37

**Supplementary Figures.**

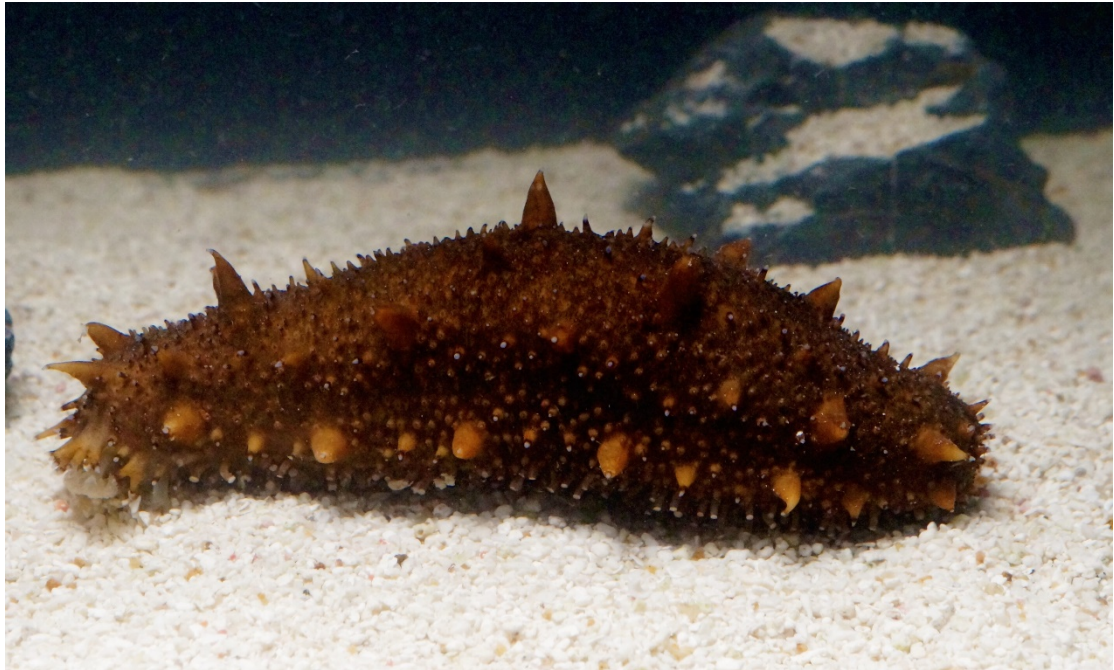

**Figure S1** The photograph of the sea cucumber, *Apostichopus japonicus*.

### Kmer=19 Depth-Frequency Distribution

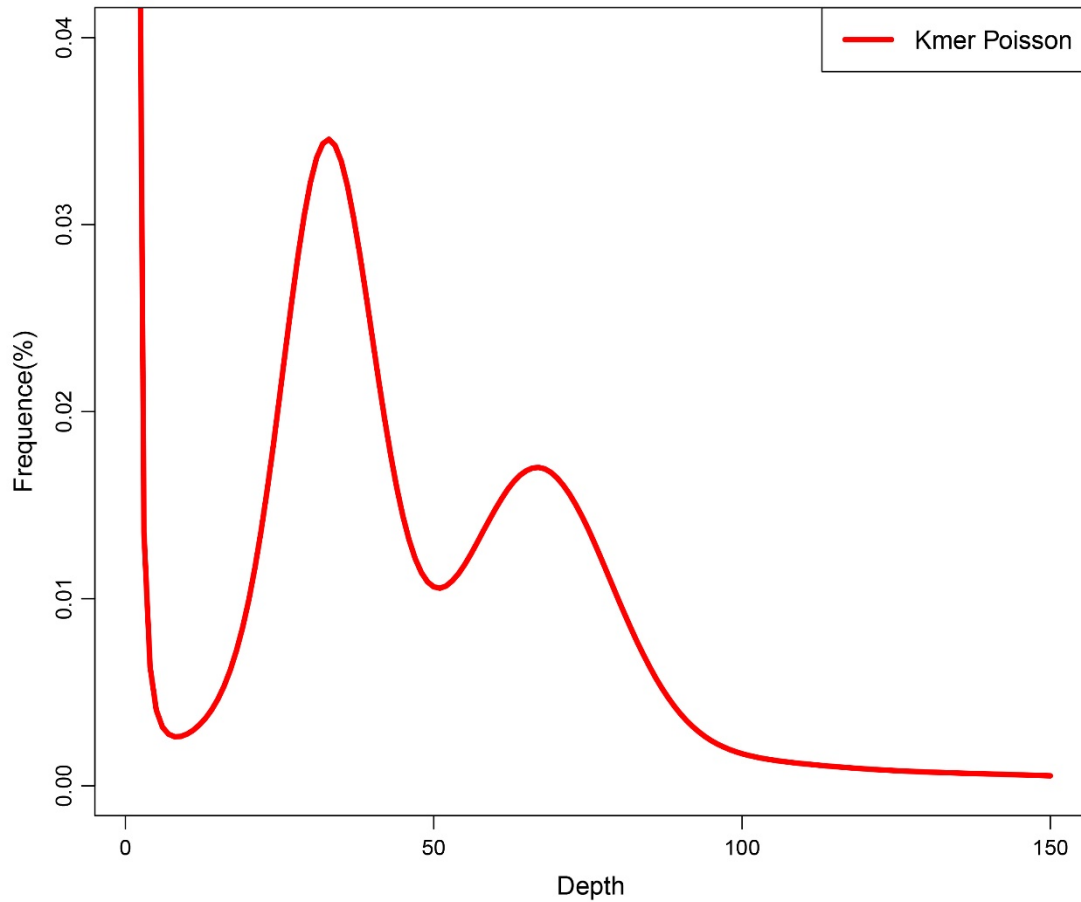

**Figure S2 Distribution of 19-mer frequency in *A. japonicus* genome.**

The 19-mer depth distribution curve was generated from high-quality short-insert reads of 180 bp, 300bp and 500bp. This K-mer distribution can be used to roughly determine the heterozygous rate and the genome size. If the heterozygous rate is higher, then another peak will be presented at 1/2 of Peak depth. Two peaks were observed at 33 $\times$  and 67 $\times$  respectively.

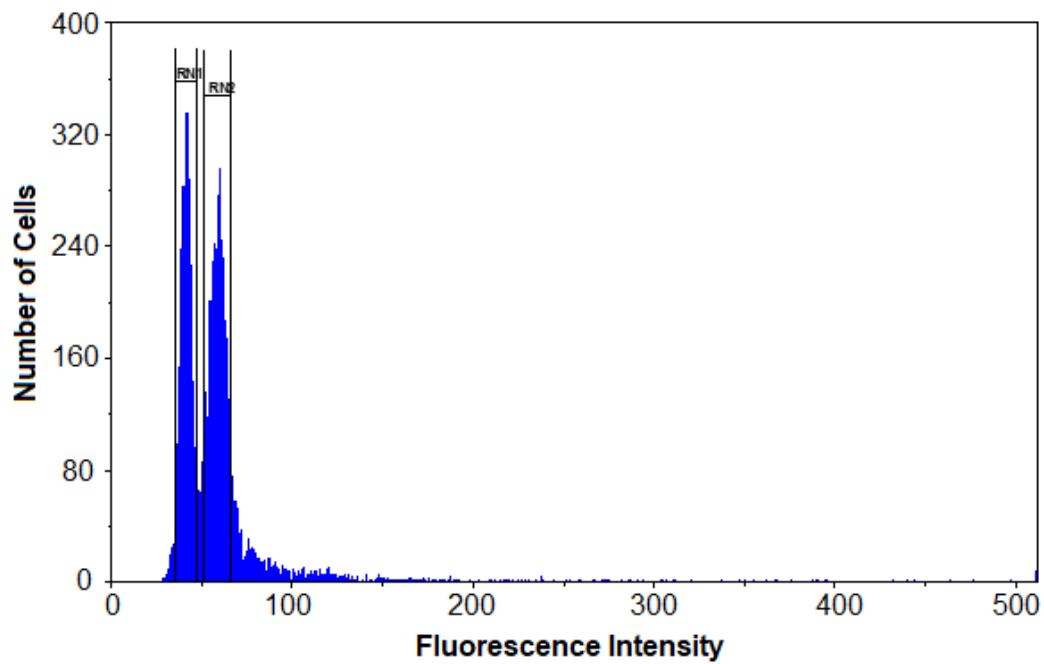

**Figure S3 Genome size determination by flow cytometry.**

The genome size of *A. japonicus* is estimated by the flow cytometry (0.878pg/1C, left peak), which is equivalent to 0.852 gigabases (Gb) per haploid genome based on the formula: 1 pg=0.978 Gb [1]. The scallop *C. farreri* (1.273pg/1C, right peak) was used as an internal reference standard.

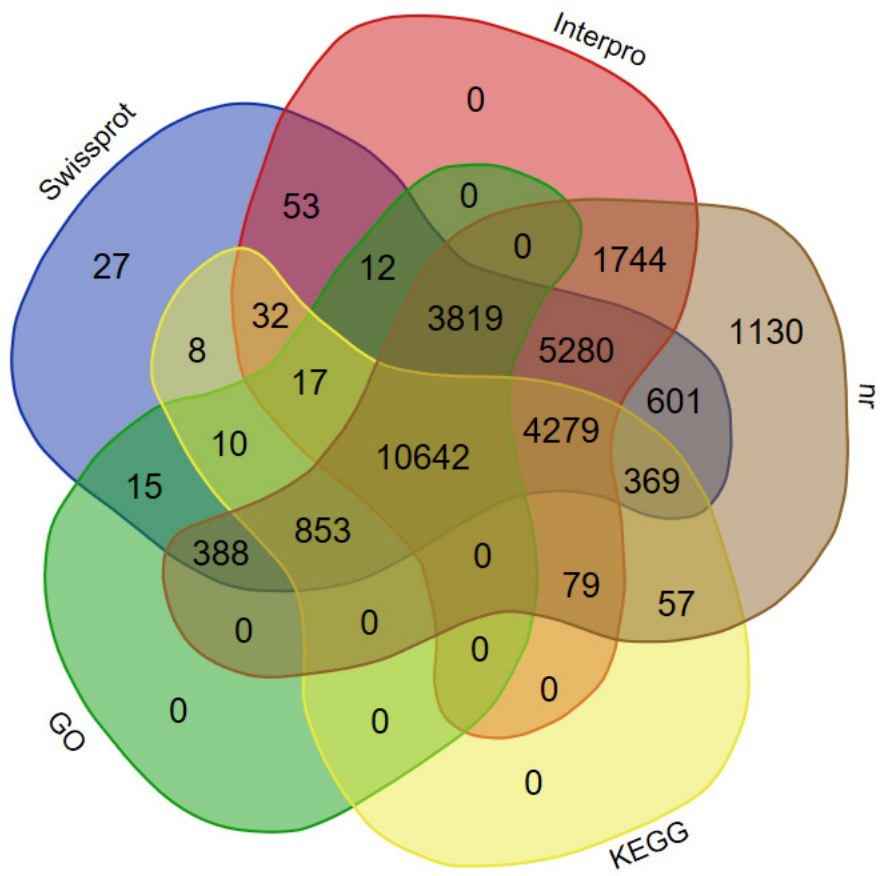

**Figure S4 Gene Function Annotation supported by different databases.**

Venn diagram of gene function annotation showed that over 96% of 29,451 genes are annotated by at least two databases

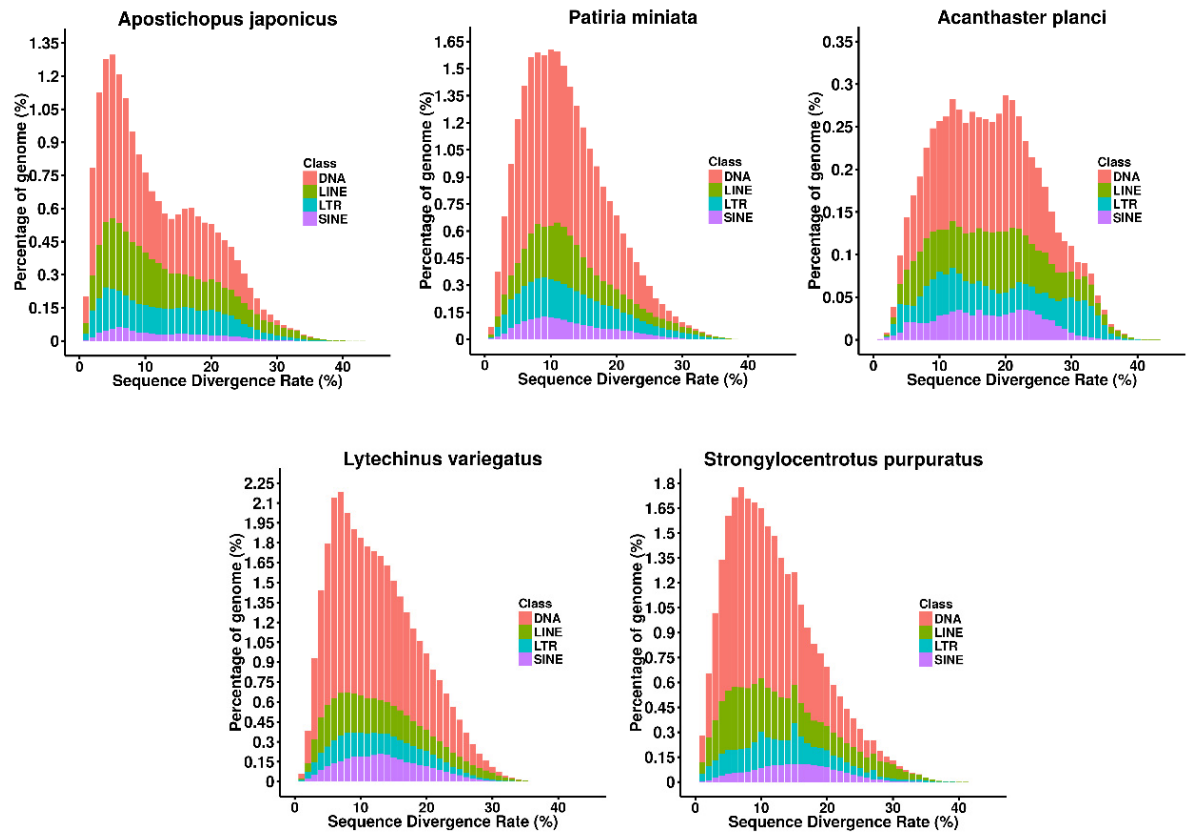

**Figure S5 Divergence rates of transposable elements (TEs).**

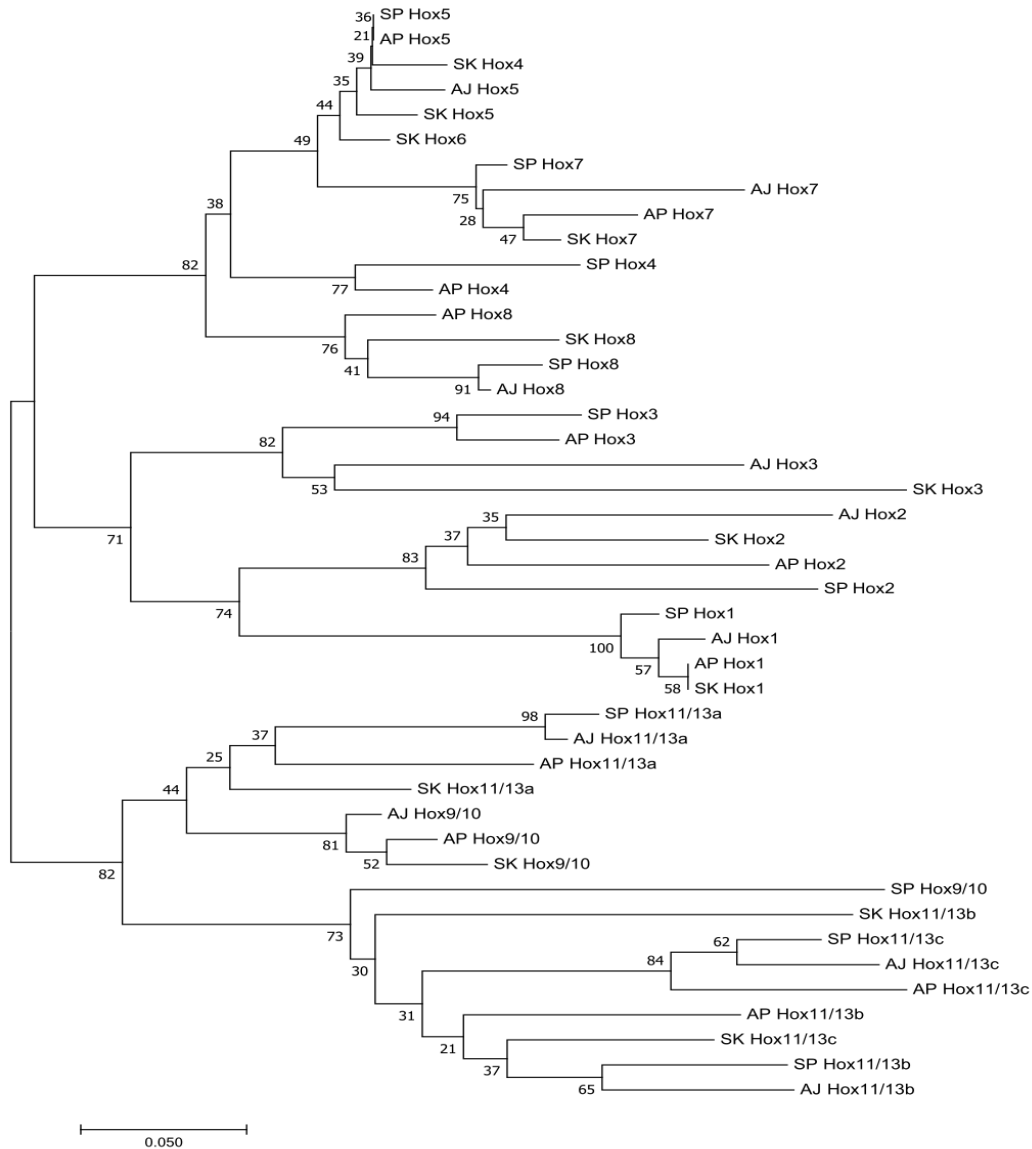

**Figure S6 Phylogenetic relationships among ambulacraria *Hox* genes.**

The homeodomain regions of *Hox* genes are adopted to construct the phylogenetic tree using the Neighbor-Joining method [2]. The evolutionary distances were computed using the p-distance method [3] and are in the units of the number of amino acid differences per site. Numbers above branches are supporting percentages of 1,000 bootstrap replicates [4]. Abbreviations of species in ambulacraria (echinodermata and hemichordata): AJ: *A. japonicus*, SP: *Strongylocentrotus purpuratus*, AP: *Acanthaster planci*, and SK: *Saccoglossus kowalevskii*.

ET\_has : MWKLIK...20...40...60...80...100...120...140...160...180...200...220...
BF\_has : MWKLIK...
PG\_bas1 : MWKLIK...
PG\_bas2 : MWKRLM...
PS\_has : MWKLIK...
MT\_bas1 : MWKLIK...
GG\_bas1 : MWKLIK...
AG\_bas1 : MWKRLI...
AV\_bas1 : MWKRLI...
PG\_bas : MWKRLV...
CA\_bas : MWKLIK...
AT\_LUP1m : MWKLIK...
AT\_LUP2m : MWKLIK...
LJ\_basM : MWKRLV...
PS\_Asm : MWKLIK...
BF\_LUS : MWKLIK...
GG\_LUS1 : MWKLIK...
OE\_LUS : MWKLIK...
TO\_LUS : MWKLIK...
AT\_LSS1 : MWKRLK...
PG\_PN21 : MWKLIK...
TO\_TRV : MWKLIK...
Lae\_OSC2 : MWKRLV...
AT\_CAS1 : MWKLIK...
BF\_CAS2 : MWKLIK...
PG\_CAS : MWKLIK...
CA\_CAS : MWKRLV...
GG\_CAS1 : MWKLIK...
PS\_CAS : MWKRLV...
RC\_CAS : MWKRLI...
BF\_CAS1 : MWKLIK...
Cfe\_CAS : MWKLIK...
Lae\_CAS1 : MWKLIK...
CS\_CAS : MWKRLI...
OS\_CAS1 : MWKRLV...
AS\_CAS1 : MWKLIK...
AV\_CAS1 : MWKLIK...
AM\_CAS1 : MWKRLI...
CF\_CPQ : MWKRLV...
JR\_PAS : MWKRLV...
AQ\_LAS : MWKRLV...
CT\_LAS : MWKRLV...
LA\_LAS : MWKRLV...
LQ\_LAS : MWKRLV...
SK\_LAS : MWKRLV...
AP\_LAS : MWKRLV...
SF\_LAS : MWKRLV...
AJ\_LAS1 : MWKRLV...
AL\_LAS2 : MWKRLV...
BF\_LAS : MWKRLV...
DR\_LAS : MWKRLV...
XR\_LAS : MWKRLV...
Gga\_LAS : MWKRLV...
MM\_LAS : MWKRLV...
HS\_LAS : MWKRLV...
w q DGHW Gpof p 2 R dggwg h eg t6f Y G166g





ET\_bas : ... 480 ... 500 ... 520 ... 540 ... 560 ... 580 ... 600 ... 620 ... 640 ... 660 ... 680 ... 700 ... 522

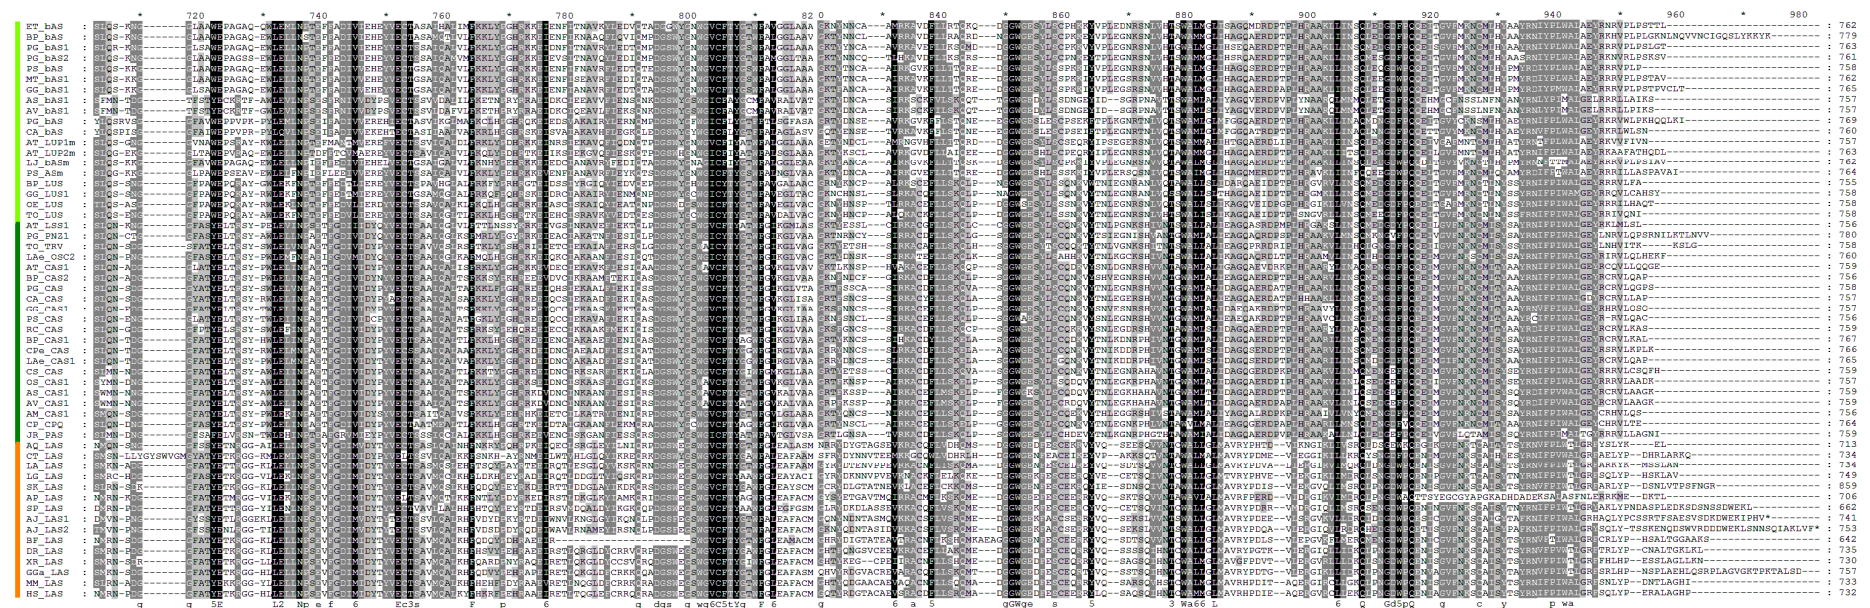

**Figure S7 Alignment of oxidosqualene cyclases sites among plants and animals.**

Alignment of oxidosqualene cyclases sites among plants and animals was performed by ClustalW [5]. Sequences of the lanosterol synthase (LAS) genes of sea cucumber and other animals were labelled in orange line, compared with cycloartenol synthase (CAS)/cucurbitadienol synthase (CPQ) of plants in dark green and  $\beta$ -amyrin synthase (BAS) of plants in light green. Abbreviations of plants, ET: *Euphorbia tirucalli*, BP: *Betula platyphylla*, PG: *Panax ginseng*, PS: *Pisum sativum*, MT: *Medicago truncatula*, GG: *Glycyrrhiza glabra*, AS: *Avena strigosa*, AV: *Avena ventricosa*, CA: *Centella asiatica*, AT: *Arabidopsis thaliana*, LJ: *Lotus japonicas*, OE: *Olea europaea*, TO: *Taraxacum officinale*, LAe: *Luffa aegyptiaca*, RC: *Ricinus communis*, CPe: *Cucurbita pepo*, CS: , OS:, AM:, CP:,JR:. Abbreviations of animals, AQ: *Amphimedon queenslandica*, CT: *Capitella teleta*, LA: *Lingula anatina*, LG: *Lottia gigantea*, SK: *Saccoglossus kowalevskii*, AP: *Acanthaster planci*, SP: *Strongylocentrotus purpuratus*, AJ: *A. japonicus*, BF: *Branchiostoma floridae*, DR: *Drosophila melanogaster*, XR:, GGa: *Gallus gallus*, MM: *Mus musculus*, HS: *Homo sapiens*.

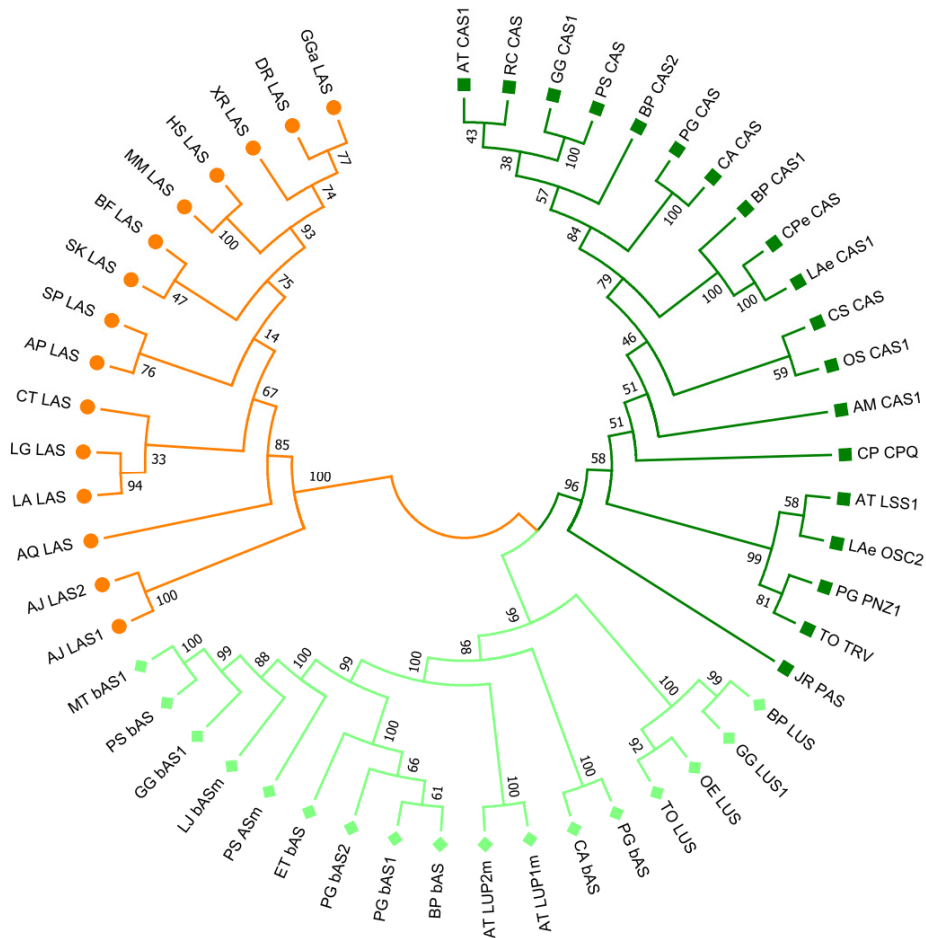

**Figure S8 Phylogenetic tree of oxidosqualene cyclases (OSCs).**

The evolutionary history was inferred using the Neighbor-Joining method [2]. The evolutionary distances were computed using the p-distance method [3]. Numbers above branches are supporting percentages of 1,000 bootstrap replicates [4]. All positions containing gaps and missing data were eliminated. The sea cucumber LAS genes (AJ\_LASs) cluster with other animal LAS genes, suggesting that they belong to the animal-type LAS; while AJ\_LASs do not cluster with other echinoderm LASs, possibly due to their fast evolutionary rates. Abbreviations can be referred to those in suppl. figure 7.



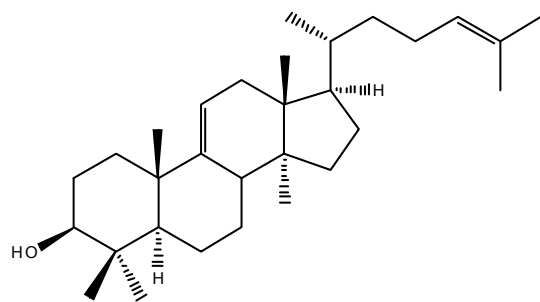

Parkeol

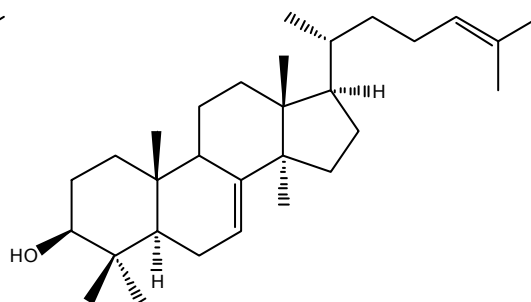

Lanosta-7, 24 dienol

**Figure S10 Chemical structures of LASs products in *A. japonicus*.**

The parkeol came from the products of AJ\_LAS1, as well as lanosta-7,24 dienol from AJ\_LAS2 in *A. japonicus*.

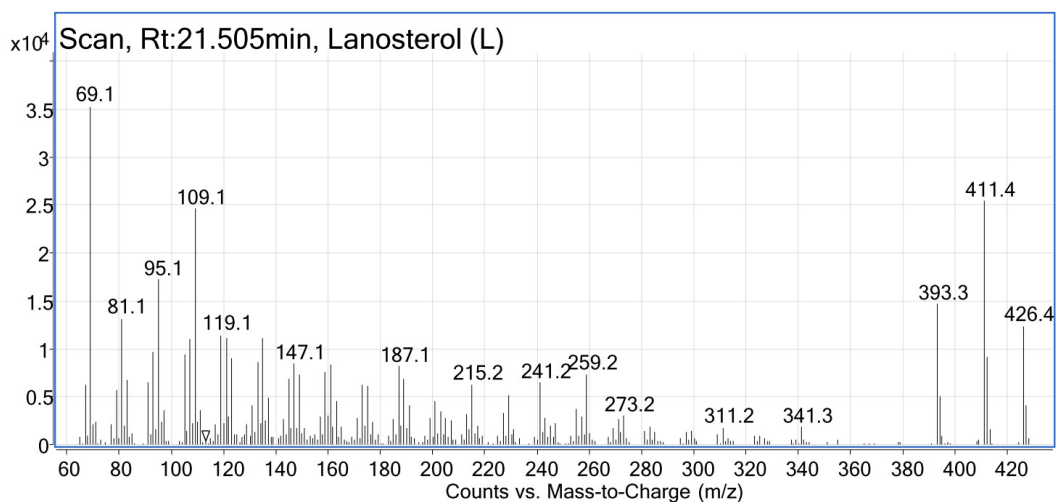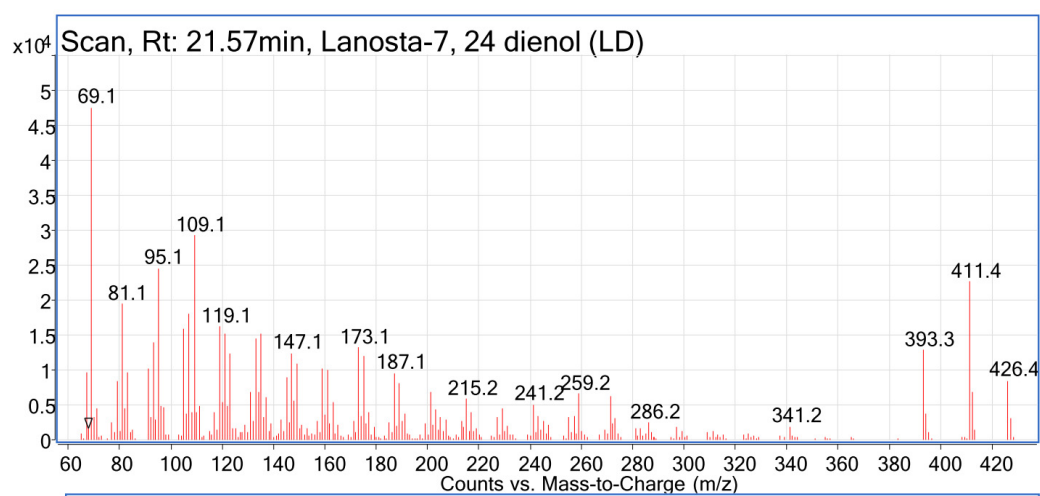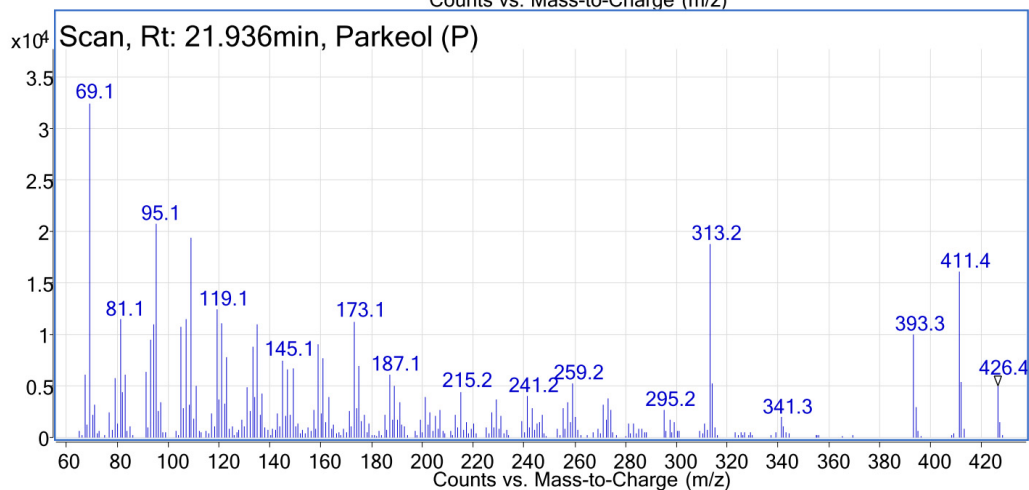

**Figure S11 Mass spectra of Lanosterol (L), Lanosta-7, 24 dienol(LD) and Parkeol (P).**

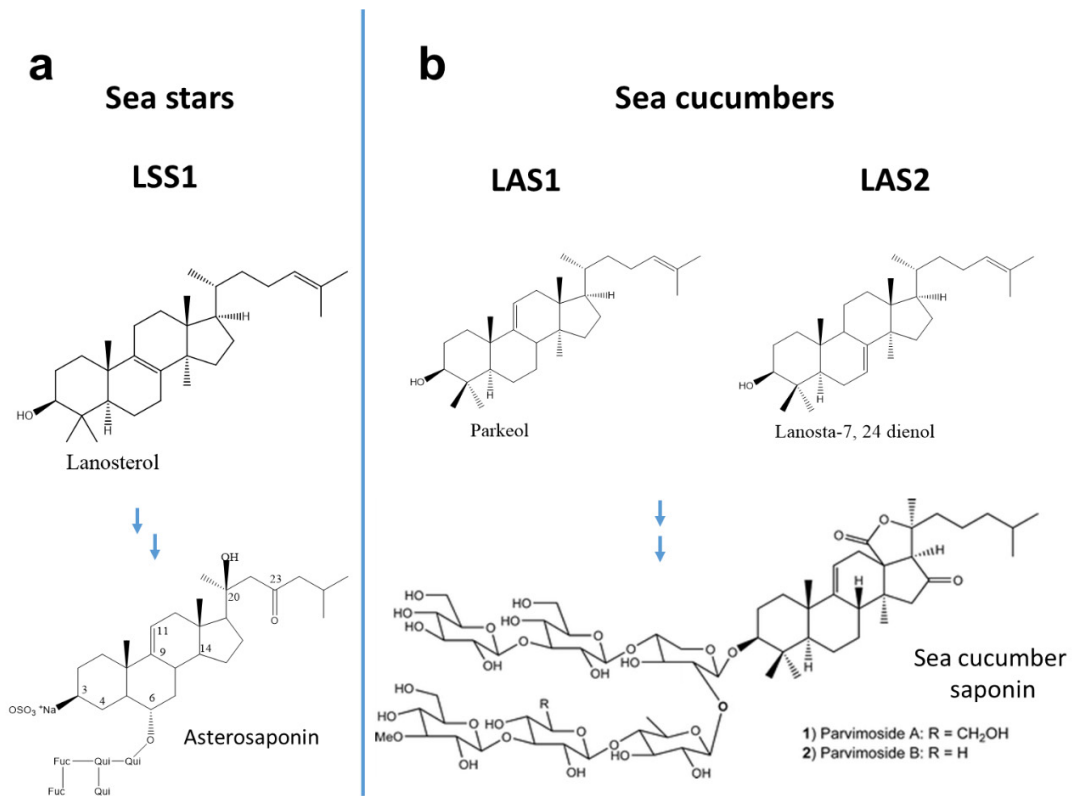

**Figure S12 Putative pathway of sterol in sea stars and sea cucumbers.**

Putative pathway of sterol precursors leading to sterols and saponins are shown for sea stars and sea cucumbers. Sea stars saponins are steroidal (a) and sea cucumber saponins are triterpenes type (b).



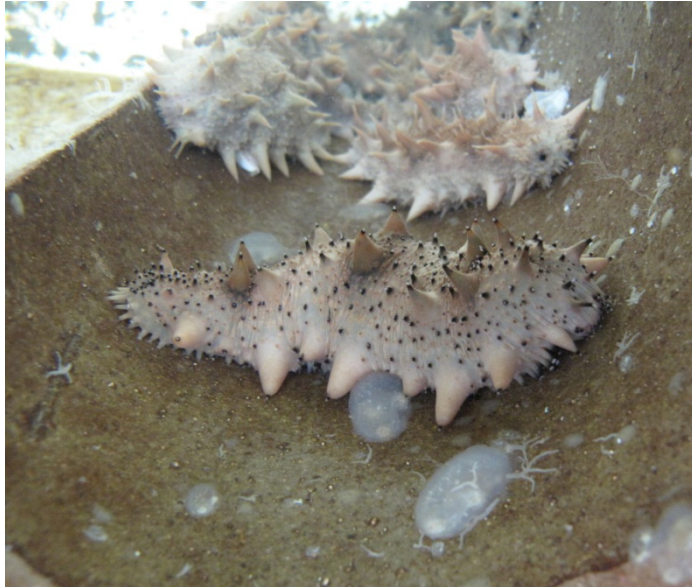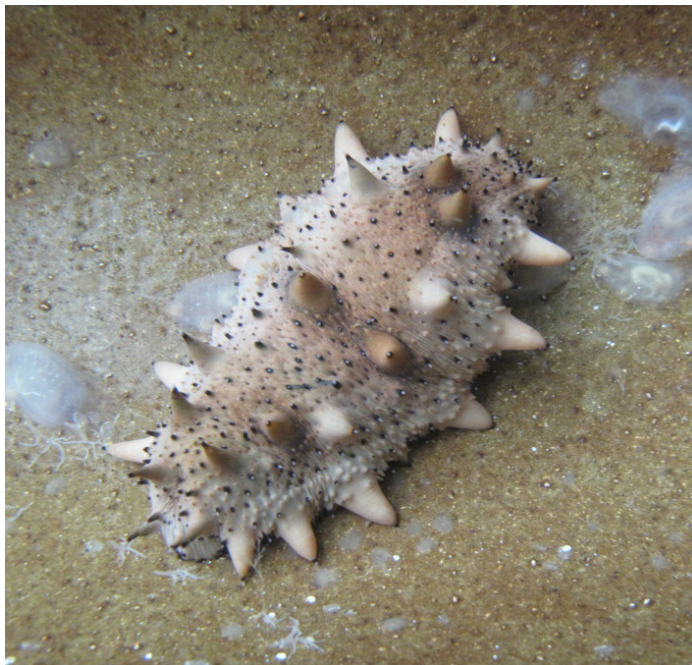

**Figure S13 The photographs of sea cucumbers under aestivation.**

The sea cucumber *A. japonicus* can enter into aestivation when sea water temperature rises above 25°C with a complete cessation of feeding and locomotion for up to 4 months, and return to active life when temperature decreases below 18°C.

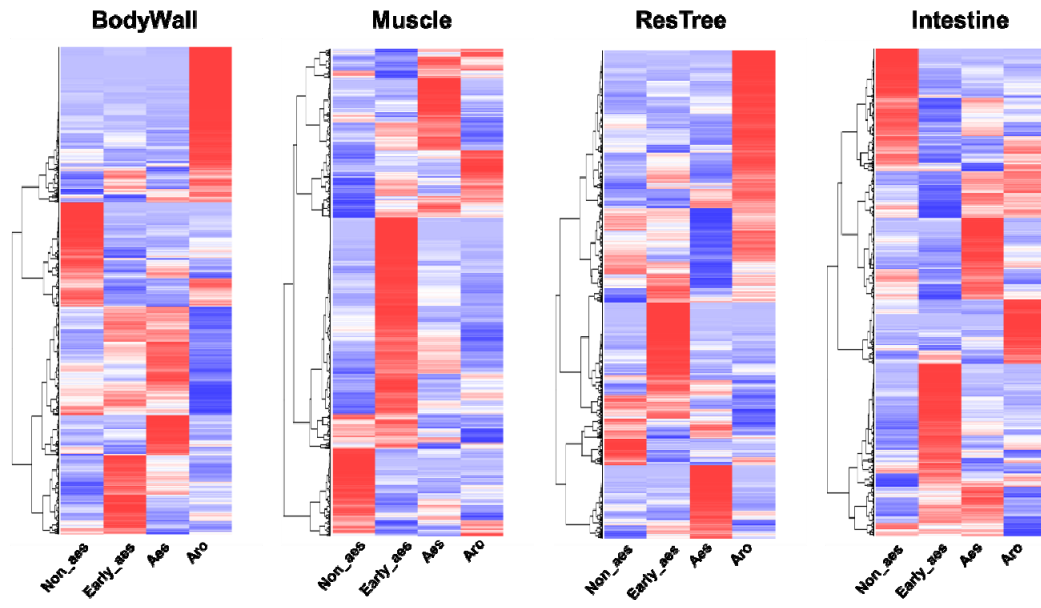

**Figure S14** Expression patterns of differential expressed genes in four organs of the sea cucumber *A. japonicus* during aestivation.

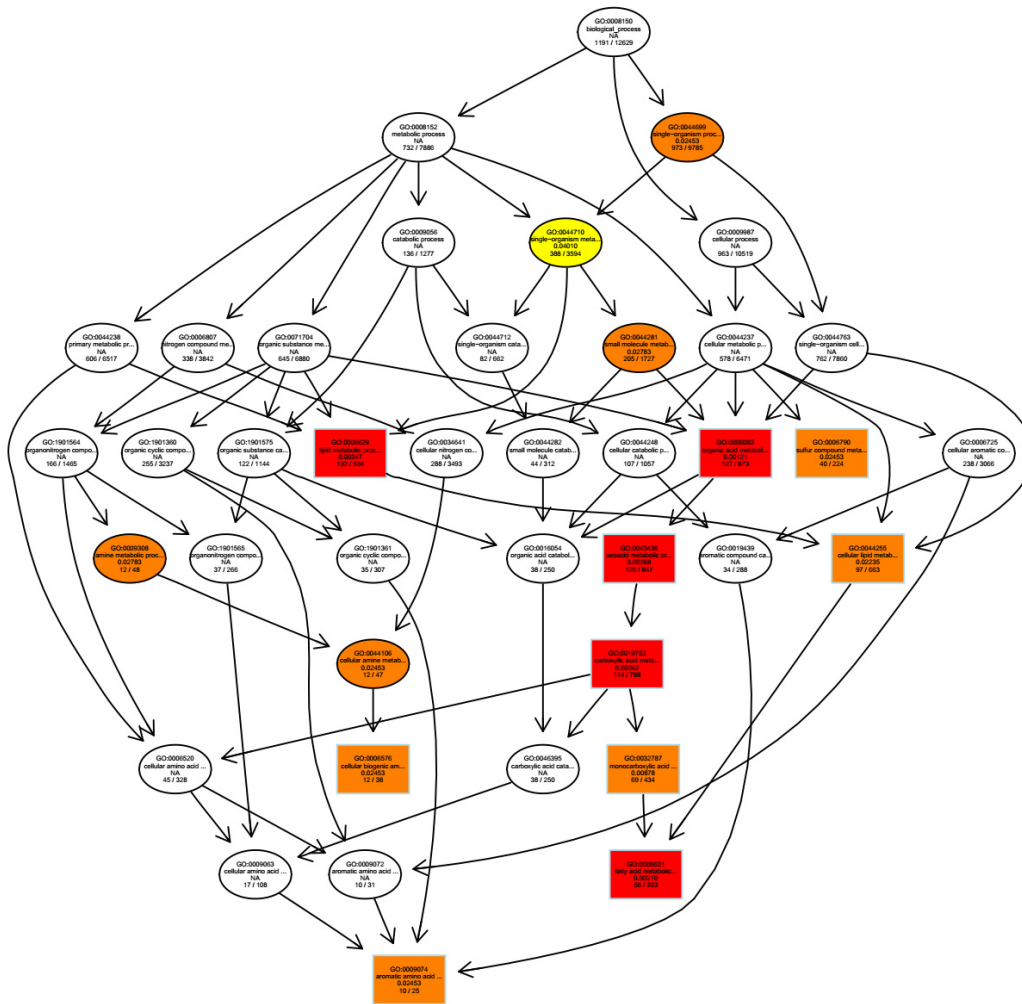

**Figure S15 Directed acyclic graph (DAG) of GO terms corresponding to biological process by enrichment analysis of DEGs in intestine during sea cucumber aestivation.**

GO was performed using the OmicShare tools, a free online platform for data analysis ([www.omicshare.com/tools](http://www.omicshare.com/tools)). GO terms that  $FDR < 0.05$  are colored from yellow to red, with the increasing of the significance. DGEs are significantly enriched in the GO terms involving in metabolic processes.

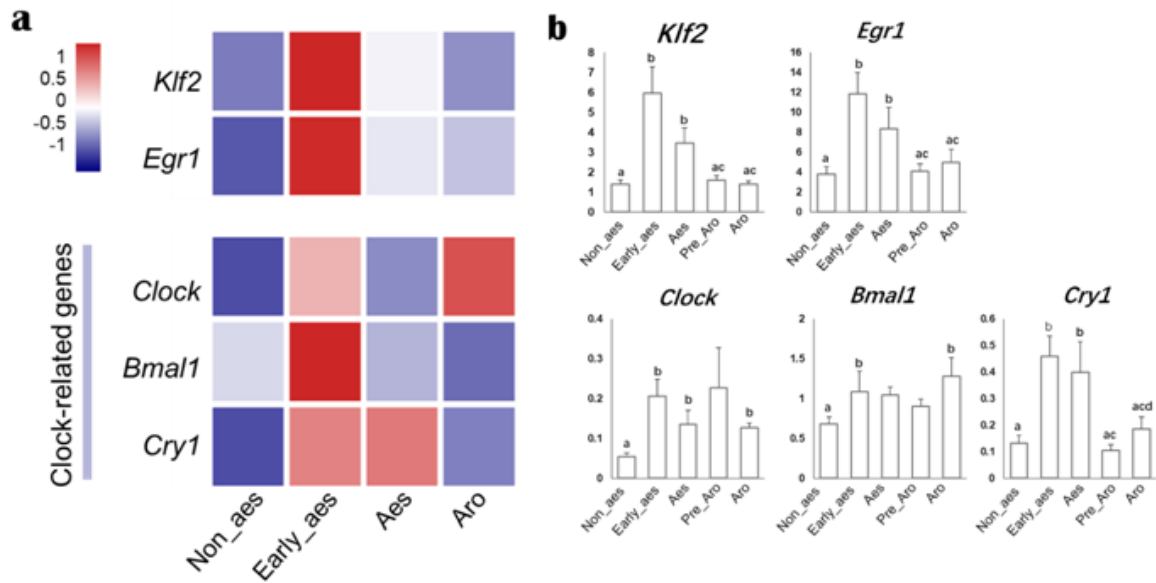

**Figure S16 Expression profiles of *Klf2*, *Egr1* and clock-related genes in body wall of *A. japonicus* during aestivation.**

(a) Heatmap presentation according to RNA-seq experiments. (b) Histogram presentation according to quantitative PCR results. Vertical bars represent the mean  $\pm$  S.E. (N=12). Different letters indicate significant differences ( $P < 0.05$ ). Aestivation states: non-aestivation (Non\_aes), early aestivation (early\_ase), deep aestivation (aes), initial arousal from aestivation (pre\_aro) and complete arousal from aestivation (aro).

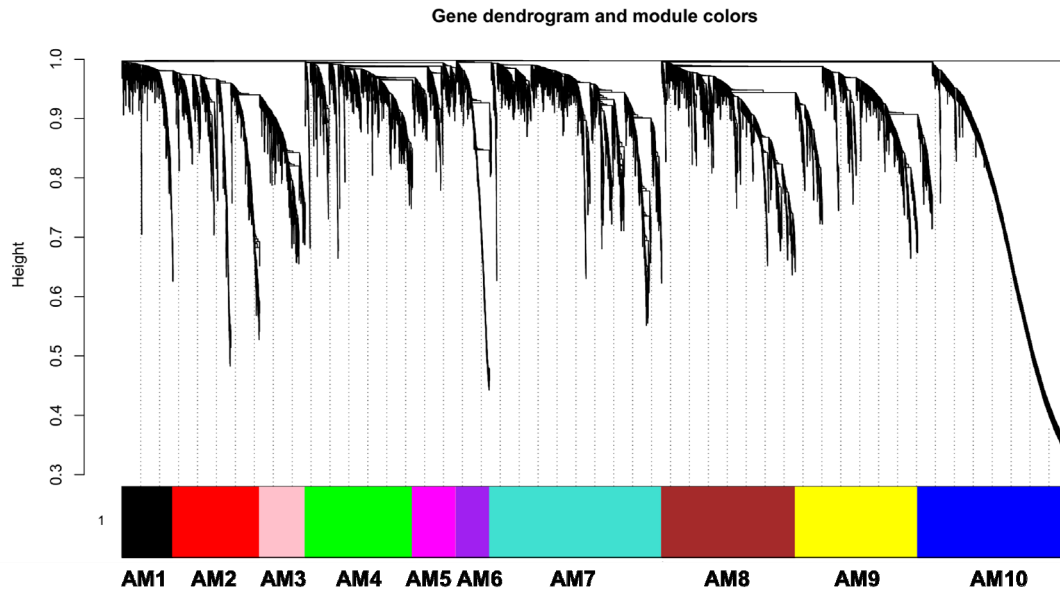

**Figure S17 Gene co-expression network of aestivation.**

Gene co-expression network constructed using 39 gene expression datasets from four organs (body wall, muscle, respiratory tree and intestine) across four different states during aestivation. Dendrograms are produced by average linkage hierarchical clustering of genes on the basis of topological overlap. Horizontal color bars represent different modules of co-expressed genes.

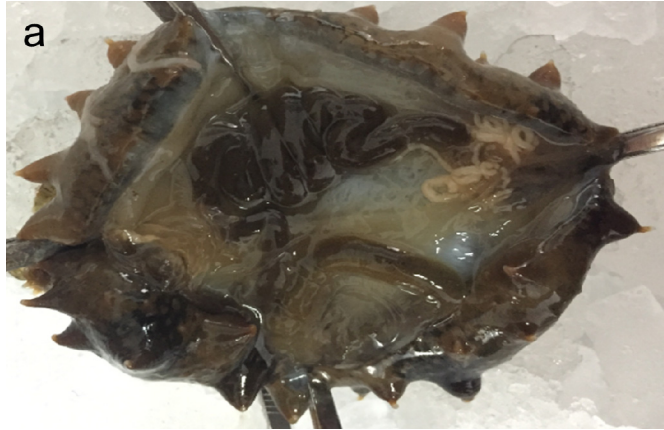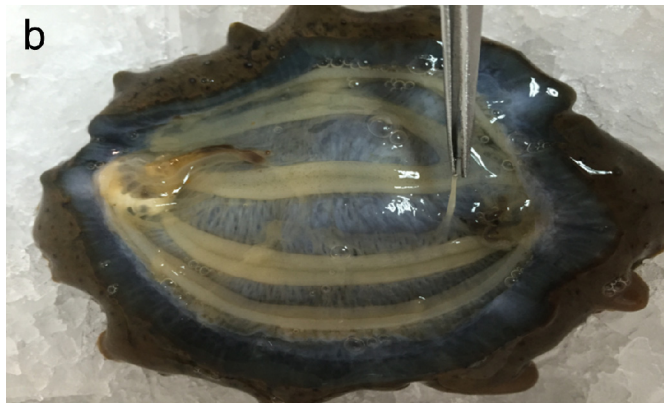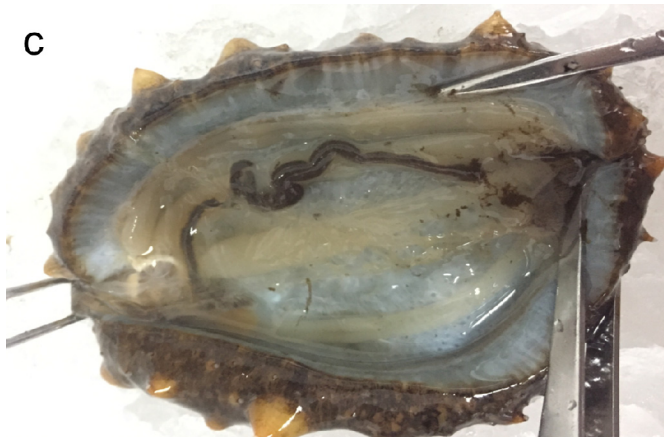

**Figure S18** The photograph shows the intestine regeneration of *A. japonicus*.

(a) Normal intestine of sea cucumber. (b) After 10 days' regeneration, the intestine is preliminarily built but without digestive function. Its appearance is gauzy. (c) After 20 days' regeneration, the intestinal wall of sea cucumber is incrassated. Fodder appeared through the intestine, showing the recovered capacity of digestion.

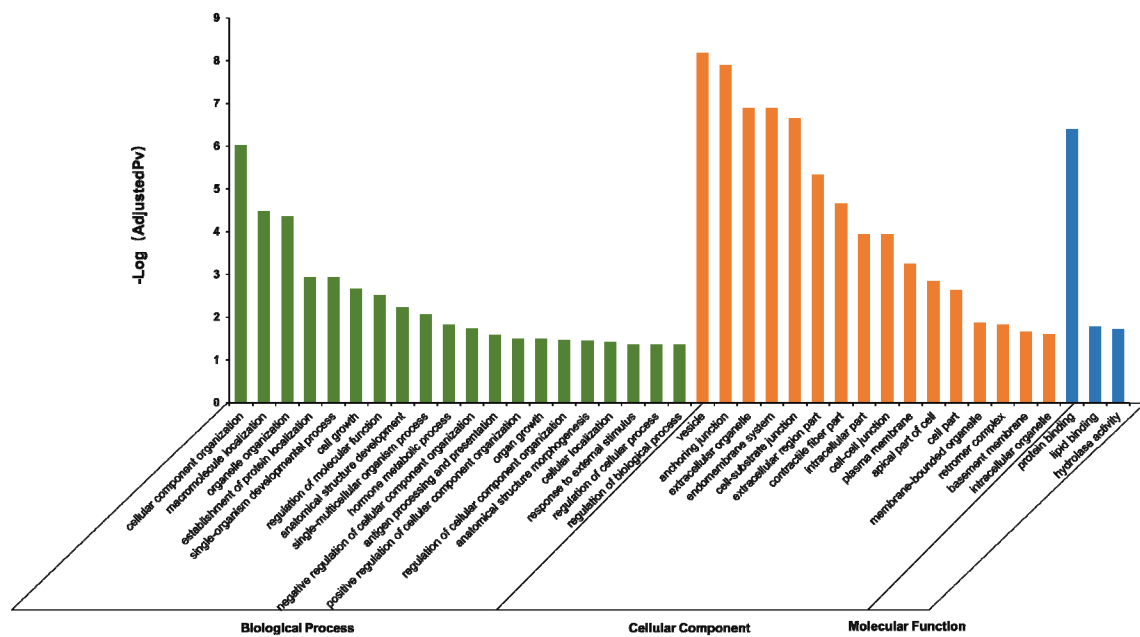

**Figure S19 GO enrichment analysis of differentially expressed genes during intestine regeneration.**

Distribution of the DEGs in each GO term. in the significantly enriched GO terms include cellular component organization, macromolecule localization, cell/organ growth, hormone metabolic process and protein binding.

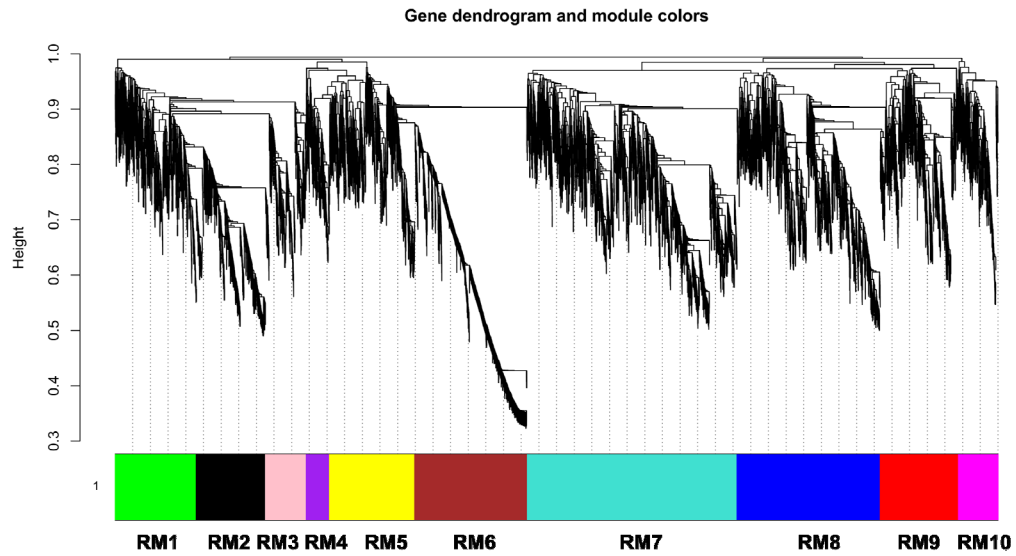

**Figure S20 Gene co-expression network of intestine regeneration.**

Gene co-expression network assigned co-expressed genes into 10 modules (RM1-RM10). RM7 and RM8 were identified as the regeneration-related modules by enrichment analysis.



**a**

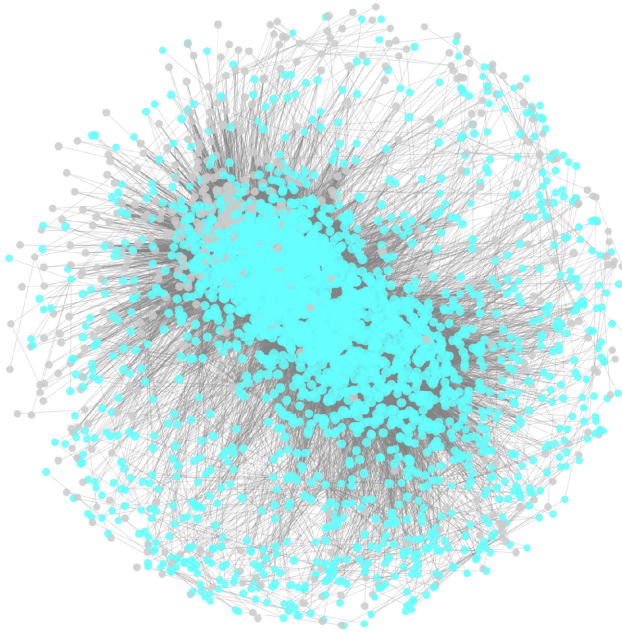

**b**

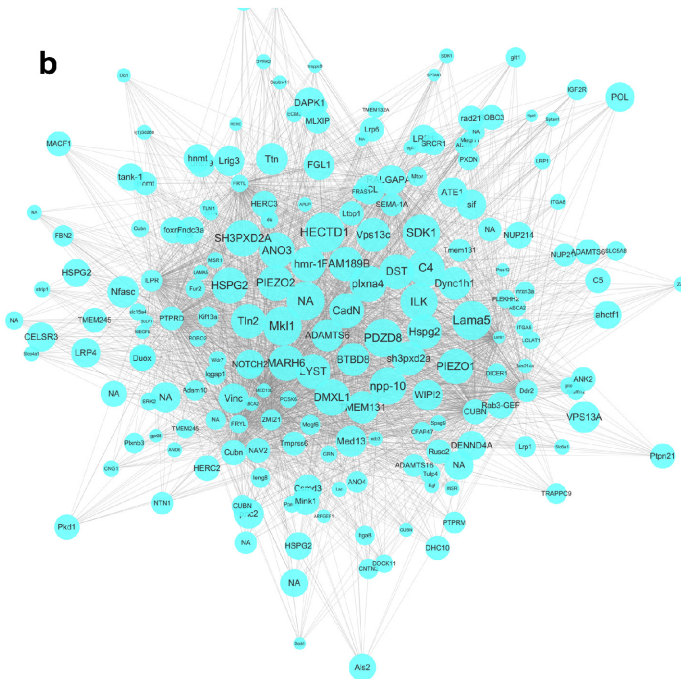

**Figure S21 Network visualization of RM7.**

(a) 76.6% of genes (turquoise box) in RM7 are differentially expressed during regeneration. (b) Top 200 genes in RM7 with the highest intramodular connectivity are chosen for network display.

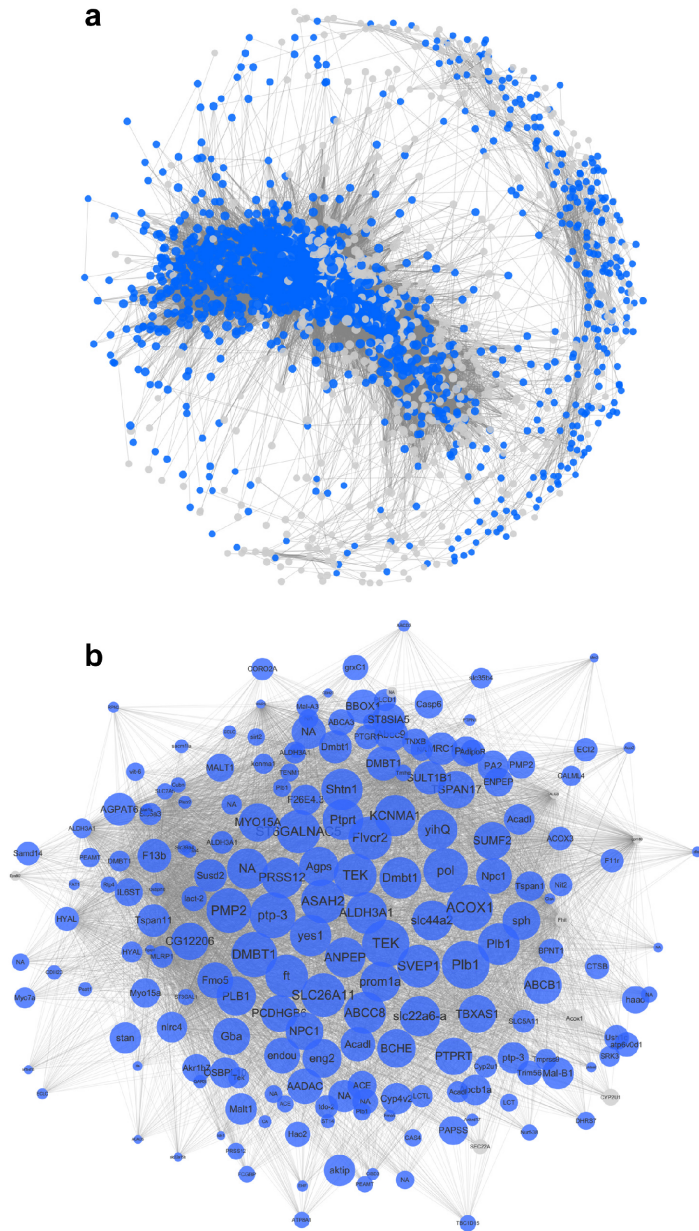

**Figure S22 Network visualization of RM8.**

(a) 64.6% of genes (blue box) in RM8 are differentially expressed during regeneration. (b) Top 200 genes in RM8 with the highest intramodular connectivity are chosen for network display.

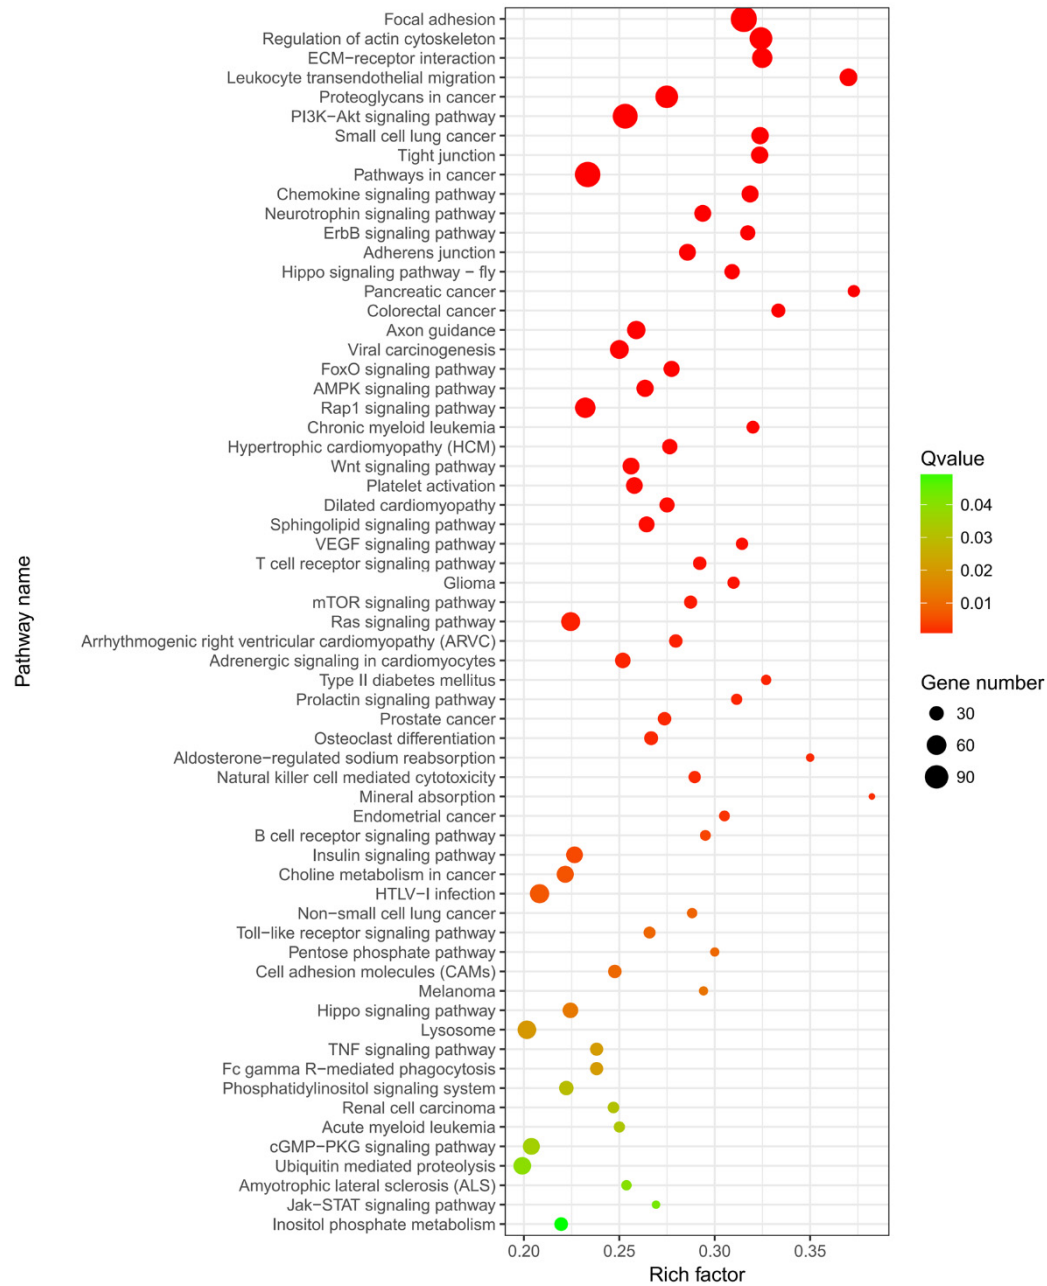

**Figure S23 KEGG enrichment of the intestine regeneration-related module RM7.**

Pathway enrichment analysis reveals that the a complex molecular regulation with diverse gene pathways involved, including PI3K-Akt, Wnt, Hippo, and mTOR signaling pathways for cell proliferation, differentiation and apoptosis.

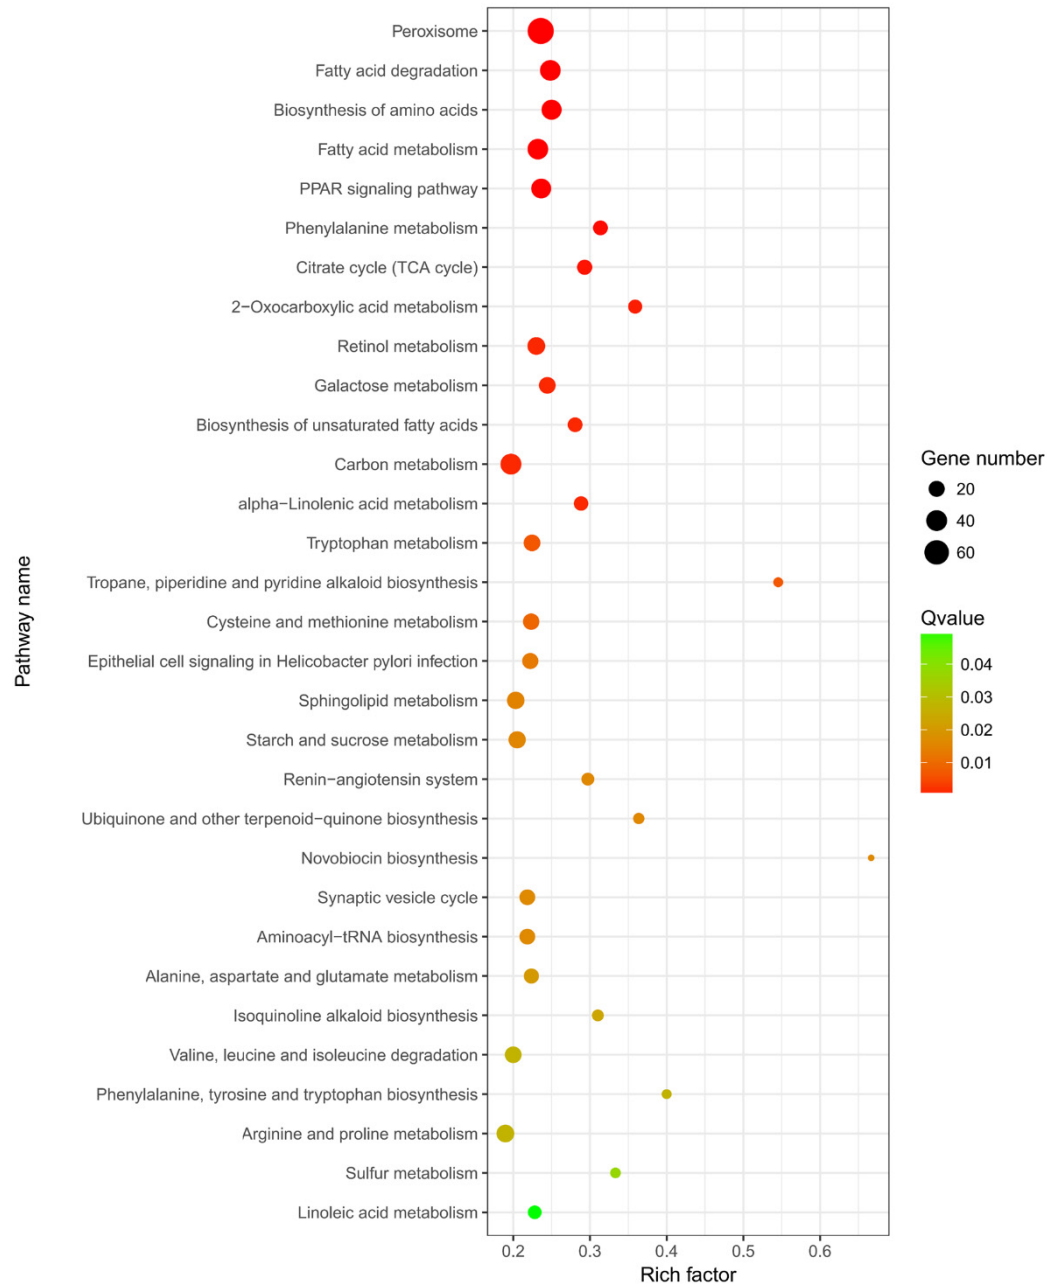

**Figure S24 KEGG enrichment of the intestine regeneration-related module RM8.**

Genes in RM8 are involved in numerous metabolism pathways such as carbon metabolism, fatty acid metabolism, carbon metabolism and retinol metabolism.

## Supplementary Tables.

**Table S1 Summary of the *Apostichopus japonicus* genome sequencing data.**

| Insert Size | Read Length(bp) | Raw Data (G) | Clean Data (G) | Sequence Depth |
|-------------|-----------------|--------------|----------------|----------------|
| 180 bp      | 100/100         | 41.99        | 41.99          | 44.1           |
| 350 bp      | 100/100         | 30.62        | 30.62          | 32.2           |
| 500 bp      | 100/100         | 34.40        | 34.40          | 36.1           |
| 450 bp      | 250/250         | 78.60        | 70.58          | 74.1           |
| 550 bp      | 300/300         | 12.07        | 10.72          | 11.3           |
| 5 Kbp       | 100/100         | 71.55        | 65.39          | 69.0           |
| 10 Kbp      | 100/100         | 21.40        | 19.54          | 20.5           |
| 15 Kbp      | 100/100         | 29.50        | 27.73          | 29.1           |
| 20 Kbp      | 100/100         | 29.21        | 28.19          | 29.6           |
| Pac-bio     | ~9 kb           | 59.09        | 23.22          | 24.4           |
| Total       | -               | 408.43       | 352.38         | 370.4          |

**Table S2 Summary statistics of the assembled *A. japonicus* genome.**

|                                |             |
|--------------------------------|-------------|
| Assembled genome size          | 952Mb       |
| Number of chromosomes          | 22          |
| Sequencing depth               | 370         |
| Contig N50                     | 45 kb       |
| Scaffold N50                   | 196 kb      |
| ESTs covered by assembly (%)   | 97.39-99.31 |
| Repeat rate (%)                | 26.68       |
| Number of protein-coding genes | 29,451      |
| Mean gene length               | 8,918 bp    |
| Mean exon length               | 202 bp      |
| Mean intron length             | 1,134 bp    |
| Average exon number per gene   | 7.4         |

**Table S3 Statistics of the *A. japonicus* genome assembly.**

|       | Contig      |        | Scaffold    |        |
|-------|-------------|--------|-------------|--------|
|       | Size(bp)    | Number | Size(bp)    | Number |
| N90   | 26,742      | 17,580 | 62,511      | 4,784  |
| N80   | 30,720      | 14,368 | 96,361      | 3,570  |
| N70   | 35,005      | 11,563 | 127,135     | 2,710  |
| N60   | 39,793      | 9,097  | 160,840     | 2,045  |
| N50   | 45,411      | 6,930  | 195,518     | 1,507  |
| Total | 919,531,577 | 21,303 | 952,279,490 | 7,286  |

**Table S4 Genome Assembly Evaluation by EST datasets.**

| Dataset  | EST Length | Number    | Total Length<br>(bp) | Covered by<br>Assembly | > 90% of                            |                                     | > 50% of |         |        |
|----------|------------|-----------|----------------------|------------------------|-------------------------------------|-------------------------------------|----------|---------|--------|
|          |            |           |                      |                        | Sequence Covered<br>by One Scaffold | Sequence Covered<br>by One Scaffold | Number   | Percent | Number |
|          | All        | 1,238,063 | 776,283,354          | 1,218,959              | 98.46%                              | 362,077                             | 29.25%   | 586,611 | 47.38% |
| Trinity  | > 200      | 1,238,063 | 776,283,354          | 1,205,710              | 97.39%                              | 358,161                             | 28.93%   | 581,447 | 46.96% |
| Assemble | > 500      | 409,578   | 527,488,811          | 404,977                | 98.88%                              | 97,141                              | 23.72%   | 196,794 | 48.05% |
| Unigene  | > 1000     | 175,157   | 365,968,655          | 173,942                | 99.31%                              | 23,783                              | 13.58%   | 70,114  | 40.03% |
|          | > 2000     | 62,671    | 210,105,631          | 62,035                 | 98.99%                              | 3,192                               | 5.09%    | 17,060  | 27.22% |



**Table S5 Summary of the linkage map and anchored scaffolds of *A. japonicus*.**

*See the separate Excel file.*

**Table S6 Whole-genome gene annotation using different prediction methods.**

| Annotation method |                       | Gene/EST Number   |
|-------------------|-----------------------|-------------------|
| De novo based     | FGENESH               | 50,794            |
|                   | GENEMARK              | 130,797           |
|                   | Augustus(cegma)       | 72,637            |
| RNA-Seq based     | PASA                  | 221,600 (isoform) |
| Homolog based     | exonerate(14 species) | 281,801 (hits)    |
| EVM integration   |                       | 29,451            |

**Table S7 Summary of gene functional annotations.**

|             | Number | Percent |
|-------------|--------|---------|
| InterPro    | 25,982 | 88.25%  |
| GO          | 15,770 | 53.57%  |
| KEGG        | 16,359 | 55.57%  |
| Swissprot   | 26,425 | 89.76%  |
| Nr          | 29,269 | 99.38%  |
| Annotated   | 29,451 | 100%    |
| Unannotated | 0      | 0%      |
| Total       | 29,451 | 100%    |

**Table S8 Gene characteristics of Echinodermata.**

| Species                              | Number | Average Transcript Length (bp) | Average CDS Length (bp) | Average Exons per Gene | Average Exon Length (bp) | Average Intron Length (bp) |
|--------------------------------------|--------|--------------------------------|-------------------------|------------------------|--------------------------|----------------------------|
| <i>Apostichopus japonicus</i>        | 29,451 | 8,918                          | 1,324                   | 7.40                   | 202                      | 1,134                      |
| <i>Strongylocentrotus purpuratus</i> | 27,750 | 19,568                         | 2,143                   | 8.9                    | 282                      | 1,217                      |
| <i>Lytechinus variegatus</i>         | 28,094 | 7,863                          | 1,062                   | 5.3                    | 198                      | 1,527                      |
| <i>Patiria miniata</i>               | 29,697 | 7,257                          | 1,068                   | 6.2                    | 185                      | 1,825                      |
| <i>Acanthaster planci</i>            | 24,747 | 8,071                          | 1,375                   | 6.8                    | 203                      | 1,161                      |

**Table S9 Statistics of the detected repeats in the *A. japonicus* genome and other echinoderms.**

| Class<br>(Mb)       | <i>Apostichorus japonicus</i><br>(952 Mb) |       | <i>Strongylocentrotus purpuratus</i><br>(991 Mb) |       | <i>Patiria miniate</i><br>(811 Mb) |       | <i>Lytechinus variegatus</i><br>(1061 Mb) |       | <i>Acanthaster planci</i><br>(384 Mb) |       |
|---------------------|-------------------------------------------|-------|--------------------------------------------------|-------|------------------------------------|-------|-------------------------------------------|-------|---------------------------------------|-------|
|                     | Lenth                                     | Rate  | Lenth                                            | Rate  | Lenth                              | Rate  | Lenth                                     | Rate  | Lenth                                 | Rate  |
|                     | (Mb )                                     | (%)   | (Mb )                                            | (%)   | (Mb )                              | (%)   | (Mb )                                     | (%)   | (Mb )                                 | (%)   |
| Tandem_Repeat       | 19.34                                     | 1.97  | 40.23                                            | 4.06  | 11.38                              | 1.40  | 25.31                                     | 2.39  | 3.41                                  | 0.89  |
| DNA                 | 34.56                                     | 3.52  | 105.74                                           | 10.67 | 32.74                              | 4.04  | 211.90                                    | 19.97 | 40.12                                 | 10.45 |
| LTR                 | 9.63                                      | 0.98  | 12.04                                            | 1.22  | 8.82                               | 1.09  | 32.56                                     | 3.07  | 14.82                                 | 3.86  |
| LINE                | 20.33                                     | 2.07  | 37.88                                            | 3.82  | 9.18                               | 1.13  | 54.94                                     | 5.18  | 18.28                                 | 4.76  |
| SINE                | 5.89                                      | 0.60  | 15.12                                            | 1.53  | 13.88                              | 1.71  | 32.40                                     | 3.05  | 4.22                                  | 1.10  |
| RNA                 | 0.76                                      | 0.08  | 0.16                                             | 0.02  | 0.10                               | 0.01  | 0.15                                      | 0.01  | 26.17                                 | 0.01  |
| Other               | 12.21                                     | 1.24  | 5.74                                             | 0.58  | 2.89                               | 0.36  | 48.61                                     | 4.58  | 13.61                                 | 3.54  |
| Unclassified<br>(A) | 151.26                                    | 15.39 | 135.20                                           | 13.64 | 255.36                             | 31.49 | 18.69                                     | 0.02  | 5.17                                  | 1.35  |
| Total               | 253.98                                    | 26.68 | 352.11                                           | 35.54 | 334.35                             | 41.23 | 424.56                                    | 38.27 | 99,76                                 | 25.99 |

**Table S10 Summary and comparison among three *A. japonicus* genome assemblies.**

|                                 | Zhang's version [6] | Jo's version [7] | this assembly |
|---------------------------------|---------------------|------------------|---------------|
| Assembly size (Gb)              | 0.81                | 0.66             | 0.95          |
| Contig N50 (kb)                 | 190                 | 5.5              | 45            |
| Scaffold N50 (kb)               | 486                 | 10.5             | 196           |
| Number of scaffolds             | 3,281               | 132,607          | 7,290         |
| Length of longest scaffold (bp) | 2,494,933           | 131,537          | 1,156,770     |
| Repeat rate (%)                 | 27.2                | 27.2             | 26.6          |
| GC content (%)                  | 36.75               | 35.92            | 37.37         |
| Number of protein-coding genes  | 30,350              | 21,771           | 29,451        |
| Mean gene length (bp)           | 7,787               | 5,388            | 8,918         |
| Mean exon length (bp)           | 193                 | 209              | 202           |
| Mean intron length (bp)         | 1,319               | 1,048            | 1,134         |

**Table S11 Summary of notochord/stomochord/gill silt-related genes in three *A. japonicus* genome assemblies.**

|               | Gene name                        | Zhang's version [6]                                                     | Jo's version [7]                    | the assembly of this study                                    |          |
|---------------|----------------------------------|-------------------------------------------------------------------------|-------------------------------------|---------------------------------------------------------------|----------|
| notochord     | <i>brachury</i>                  | mRNA.AJAP22596                                                          | g39634.t1                           | AJ283.8                                                       |          |
|               | <i>b-catenin</i>                 | mRNA.AJAP17491,<br>mRNA.AJAP00402                                       | g65510.t1,<br>g65511.t1             | AJ7206.2, AJ5615.3                                            |          |
|               | <i>hh</i>                        | mRNA.AJAP09937                                                          | g42841.t1,<br>g73769.t1             | AJ1894.13                                                     |          |
|               | <i>calumenin</i>                 | mRNA.AJAP14051,<br>mRNA.AJAP06653,<br>mRNA.AJAP06654                    | g6107.t1,<br>g72140.t1              | AJ3978.13, AJ3978.12                                          |          |
|               | <i>leprecan</i>                  | mRNA.AJAP13376                                                          | g37661.t1                           | AJ6909.2                                                      |          |
|               | <i>Admp</i><br>( <i>BMP2/4</i> ) | mRNA.AJAP17205,<br>mRNA.AJAP07010                                       | g67880.t1,<br>g18791.t1             | AJ566.3, AJ6686.2                                             |          |
|               | <i>chordin</i>                   | mRNA.AJAP13675                                                          | g72125.t1                           | AJ48.9, AJ1206.17<br>AJ4262.4, AJ437.4,<br>AJ6677.1, AJ623.1, |          |
|               | <i>b4GalT</i>                    | mRNA.AJAP20115,<br>mRNA.AJAP26309,<br>mRNA.AJAP21792,<br>mRNA.AJAP13686 | g6121.t1,<br>g10176.t1,<br>g7929.t1 | AJ2927.1,<br>AJ2588.5,<br>AJ7705.2,<br>AJ819.6,<br>AJ515.9    |          |
|               | stomochord                       | <i>otx</i>                                                              | mRNA.AJAP05566,<br>mRNA.AJAP13361   | g30922.t1                                                     | AJ1239.3 |
|               |                                  | <i>dmbx</i>                                                             | mRNA.AJAP17215                      | g52085.t1                                                     | AJ593.2  |
| <i>gsc</i>    |                                  | mRNA.AJAP01576,<br>mRNA.AJAP21588                                       | Not present                         | AJ446.4                                                       |          |
| <i>dkk</i>    |                                  | mRNA.AJAP22809                                                          | g10775.t1                           | AJ5557.3                                                      |          |
| <i>hex</i>    |                                  | mRNA.AJAP19023                                                          | g6975.t1                            | AJ4320.7                                                      |          |
| <i>nkx2.1</i> |                                  | mRNA.AJAP07235                                                          | g5132.t1                            | AJ196.14                                                      |          |
| <i>nkx2.2</i> |                                  | mRNA.AJAP03077                                                          | g25771.t1                           | AJ168.2                                                       |          |
| gill silt     | <i>pax1/9</i>                    | mRNA.AJAP15401,<br>mRNA.AJAP03074                                       | g39612.t1,<br>g59229.t1             | AJ567.4                                                       |          |
|               | <i>mipoll</i>                    | mRNA.AJAP03073                                                          | g31441.t1                           | AJ1177.4                                                      |          |
|               | <i>foxa1</i>                     | mRNA.AJAP03072                                                          | g46003.t1                           | AJ1381.2                                                      |          |

**Table S12 Summary of biomineralization-related genes in three *A. japonicus* genome assemblies.**

| Genes         | Zhang's version [6] | Jo's version [7] | the assembly of this study |
|---------------|---------------------|------------------|----------------------------|
| <i>can1</i>   | mRNA.AJAP03754      | g37171.t1        | AJ2597.6                   |
| <i>colp3a</i> | mRNA.AJAP02383      | g72407.t1        | AJ416.9                    |
| <i>cyp1</i>   | mRNA.AJAP01093      | g8019.t1         | AJ5068.5                   |
| <i>cyp2</i>   | mRNA.AJAP22588      | g68287.t1        | AJ240.12                   |
| <i>msp130</i> | mRNA.AJAP11747      | g52463.t1        | AJ4966.2,<br>AJ7701.3      |
| <i>p19L</i>   | mRNA.AJAP26626      | Not present      | AJ1381.2                   |



**Table S13 Summary of PSP94-like genes in the assembly generated by this study.**

| PSP94-like IDs in this assembly | <i>P</i> value of this study |
|---------------------------------|------------------------------|
| AJ1576.2                        | 1.17E-02                     |
| AJ1652.1                        | 8.27E-05                     |
| AJ1652.4                        | 1.81E-10                     |
| AJ1512.1                        | 4.82E-07                     |
| AJ1512.2                        | 2.33E-05                     |
| AJ1512.3                        | 3.61E-03                     |
| AJ1512.4                        | 2.04E-02                     |
| AJ1512.5                        | 2.58E-04                     |
| AJ1512.6                        | 8.12E-08                     |
| AJ1733.1                        | 1                            |

Note: Genes named of AJ1512.1-AJ1512.6 are located in the same scaffold, which is consistent with Zhang et al's report. *P* values indicate the significance of differential gene expression during intestine regeneration. According to our study, most of PSP94-like genes are also differentially expressed during intestine regeneration, supporting their potential roles in intestine regeneration as revealed by Zhang et al. [6].

**Table S14 Summary of intestine regeneration-related genes (reported by Zhang et al. [6] ) in the assembly of this study.**

*See the separate Excel file.*

**Table S15 Number and density of SNPs in eight *A. japonicus* individuals.**

|             | Aj-1      | Aj-2      | Aj-3      | Aj-4      | Aj-5      | Aj-6      | Aj-7      | Aj-8      |
|-------------|-----------|-----------|-----------|-----------|-----------|-----------|-----------|-----------|
| Total       | 3,612,795 | 4,084,169 | 3,968,122 | 4,015,860 | 3,956,270 | 4,200,053 | 4,012,077 | 3,964,961 |
| Rate(%)     | 1.2424    | 1.2085    | 1.1515    | 1.1896    | 1.1745    | 1.2318    | 1.1894    | 1.1459    |
| Intergenic  | 2,477,730 | 2,790,084 | 2,716,835 | 2,751,081 | 2,706,442 | 2,871,823 | 2,742,984 | 2,712,871 |
| Rate(%)     | 1.2789    | 1.2327    | 1.1782    | 1.2182    | 1.2013    | 1.2553    | 1.2152    | 1.1639    |
| Gene region | 1,135,065 | 1,294,085 | 1,251,287 | 1,264,779 | 1,249,828 | 1,328,230 | 1,269,093 | 1,252,090 |
| Rate(%)     | 1.1696    | 1.1594    | 1.0977    | 1.1319    | 1.1202    | 1.1840    | 1.1371    | 1.1086    |
| Exon        | 203,100   | 229,206   | 222,114   | 225,471   | 223,014   | 235,179   | 226,545   | 222,309   |
| Rate(%)     | 1.0854    | 1.0753    | 1.0314    | 1.0596    | 1.0493    | 1.0976    | 1.0637    | 1.0331    |
| Intron      | 931,965   | 1,064,879 | 1,029,173 | 1,039,308 | 1,026,814 | 1,093,051 | 1,042,548 | 1,029,781 |
| Rate(%)     | 1.1896    | 1.1793    | 1.1131    | 1.1489    | 1.1368    | 1.2044    | 1.1544    | 1.1263    |

**Table S16 Summary of the highly polymorphic genes identified from the *A. japonicus* genome.**

*See the separate Excel file.*

**Table S17 GO enrichment analysis of the identified highly polymorphic genes.**

| GO_ID      | GO_Term                                       | GO_Class | Pvalue   | AdjustedPv |
|------------|-----------------------------------------------|----------|----------|------------|
| GO:0009056 | catabolic process                             | BP       | 3.37E-06 | 0.00013998 |
| GO:0051234 | establishment of localization                 | BP       | 3.25E-05 | 0.00094602 |
| GO:0044765 | single-organism transport                     | BP       | 4.36E-05 | 0.00105709 |
| GO:0044237 | cellular metabolic process                    | BP       | 4.90E-05 | 0.00109661 |
| GO:0009058 | biosynthetic process                          | BP       | 8.13E-05 | 0.00164687 |
| GO:0065008 | regulation of biological quality              | BP       | 0.000117 | 0.00199651 |
| GO:0071704 | organic substance metabolic process           | BP       | 0.000179 | 0.00260407 |
| GO:0006807 | nitrogen compound metabolic process           | BP       | 0.000547 | 0.00723783 |
| GO:0007610 | behavior                                      | BP       | 0.000584 | 0.00738751 |
| GO:0022414 | reproductive process                          | BP       | 0.001035 | 0.0108     |
| GO:0044710 | single-organism metabolic process             | BP       | 0.001039 | 0.0108     |
| GO:0044238 | primary metabolic process                     | BP       | 0.001842 | 0.01786634 |
| GO:0044703 | multi-organism reproductive process           | BP       | 0.002695 | 0.02529792 |
| GO:0032844 | regulation of homeostatic process             | BP       | 0.002785 | 0.02532177 |
| GO:0009893 | positive regulation of metabolic process      | BP       | 0.003444 | 0.02941336 |
| GO:0032504 | multicellular organism reproduction           | BP       | 0.003548 | 0.02941336 |
| GO:0048609 | multicellular organismal reproductive process | BP       | 0.003726 | 0.02941336 |
| GO:0044708 | single-organism behavior                      | BP       | 0.005063 | 0.03877122 |
| GO:0023056 | positive regulation of signaling              | BP       | 0.005948 | 0.04400163 |
| GO:0044702 | single organism reproductive process          | BP       | 0.006048 | 0.04400163 |
| GO:0045184 | establishment of protein localization         | BP       | 0.00636  | 0.04513715 |
| GO:0006810 | transport                                     | BP       | 0.007157 | 0.04932387 |
| GO:0043227 | membrane-bounded organelle                    | CC       | 7.54E-13 | 2.19E-10   |
| GO:0043229 | intracellular organelle                       | CC       | 1.44E-06 | 8.40E-05   |
| GO:0044424 | intracellular part                            | CC       | 3.08E-06 | 0.00013998 |
| GO:0016021 | integral component of membrane                | CC       | 7.74E-06 | 0.00028162 |
| GO:0031224 | intrinsic component of membrane               | CC       | 1.30E-05 | 0.00042009 |
| GO:0043230 | extracellular organelle                       | CC       | 0.000104 | 0.00188305 |
| GO:0031982 | vesicle                                       | CC       | 0.000131 | 0.00212354 |
| GO:0012505 | endomembrane system                           | CC       | 0.000179 | 0.00260407 |

---

|            |                                         |    |          |            |
|------------|-----------------------------------------|----|----------|------------|
| GO:0044464 | cell part                               | CC | 0.000222 | 0.00308175 |
| GO:0030529 | ribonucleoprotein complex               | CC | 0.000712 | 0.00862874 |
| GO:0031090 | organelle membrane                      | CC | 0.000967 | 0.0108     |
| GO:0043233 | organelle lumen                         | CC | 0.003092 | 0.02726633 |
| GO:0044425 | membrane part                           | CC | 0.00374  | 0.02941336 |
| GO:0032420 | stereocilium                            | CC | 0.007446 | 0.04932387 |
| GO:0043234 | protein complex                         | CC | 0.007458 | 0.04932387 |
| GO:0097159 | organic cyclic compound binding         | MF | 3.08E-07 | 3.83E-05   |
| GO:0043167 | ion binding                             | MF | 3.94E-07 | 3.83E-05   |
| GO:1901363 | heterocyclic compound binding           | MF | 6.03E-07 | 4.38E-05   |
| GO:0036094 | small molecule binding                  | MF | 4.03E-05 | 0.00105709 |
| GO:0022857 | transmembrane transporter activity      | MF | 8.49E-05 | 0.00164687 |
| GO:0022892 | substrate-specific transporter activity | MF | 0.000859 | 0.00999299 |
| GO:0097367 | carbohydrate derivative binding         | MF | 0.001175 | 0.01179546 |

---

**Table S18 The gene representation of canonical animal cholesterol synthesis pathway in *A. japonicus* and other selected animal genomes.**

*See the separate Excel file.*

**Table S19 Oligo's used in the study. Underlined sequence indicates pYES2 vector sequence and the sequence in bold corresponds to OSC gene sequence. Middle F and R are overlapping oligos for the two fragments.**

| Experimental purpose | Oligo Name       | Sequence                                                                     |
|----------------------|------------------|------------------------------------------------------------------------------|
| AJ-LAS1 cloning      | AJ-LAS1 Gap.NT-F | ACTACTAGCAGCTGTAATACGACTCACTATAGGGAATATT<br><b>ATGCCTGGGCTGAGGAGAATTG</b>    |
|                      | AJ-LAS1 middleR  | ATAGCCATCGCAGCGTACGAGACGTCCCATATCTGCGTTCCG<br>TTTGTACC                       |
|                      | AJ-LAS1 middleF  | GGTACAAACGGAACGCAGATATGGGACGTCTCGTACGCTGC<br>GATGGCTAT                       |
|                      | AJ-LAS1 Gap.CT-R | GAATGTAAGCGTGACATAACTAATTACATGATGCGGCCCT<br><b>TTATAACATGGGGGATCTTTTCCA</b>  |
| AJ-LAS2 cloning      | AJ-LAS2 Gap.NT-F | ACTACTAGCAGCTGTAATACGACTCACTATAGGGAATATT<br><b>ATGCAGTCCGATAATGACCACA</b>    |
|                      | AJ-LAS2 middleR  | ATAGCAGCAAAGGAAGTGTCCCAAACCTTGATTACCGTTAGT<br>GCCCTGCAC                      |
|                      | AJ-LAS2 middleF  | GTGCAGGGCACTAACGGTAATCAAGTTTGGGACACTTCCTT<br>TGCTGCTAT                       |
|                      | AJ-LAS2 Gap.CT-R | GAATGTAAGCGTGACATAACTAATTACATGATGCGGCCCT<br><b>CTAAAATACCAATTTAGCAATCTGC</b> |
| Sequencing           | AJ-LAS1 middleF  | GAATGTCGTATCTCTACGGC                                                         |
|                      | AJ-LAS2 middleF  | ATGAACTGATAATGGACCT                                                          |
|                      | GAL1.F           | AATATACCTCTATACTTTAACGTC                                                     |
|                      | pYES2.rev        | GCGTGAATGTAAGCGTGAC                                                          |



**Table S20 Summary of the read mapping of RNA-seq data from various stages of aestivation.**

|            | Total reads | Total mapped reads | Mapped percentage |        |
|------------|-------------|--------------------|-------------------|--------|
| Intestine  | Non-aes1    | 16,974,649         | 13,976,498        | 82.34% |
|            | Non-aes2    | 15,798,554         | 12,971,002        | 82.10% |
|            | Early-aes1  | 13,661,149         | 11,417,448        | 83.58% |
|            | Early-aes2  | 16,350,781         | 13,708,648        | 83.84% |
|            | Aes1        | 15,021,969         | 12,593,986        | 83.84% |
|            | Aes2        | 21,301,584         | 18,019,895        | 84.59% |
|            | Aes3        | 23,766,102         | 20,067,725        | 84.44% |
|            | Aro1        | 16,034,078         | 13,286,104        | 82.86% |
|            | Aro2        | 13,345,897         | 11,226,638        | 84.12% |
|            | Aro3        | 20,724,821         | 17,610,549        | 84.97% |
| ResTree    | Non-aes1    | 26,344,952         | 20,868,096        | 79.21% |
|            | Non-aes2    | 21,568,160         | 17,145,915        | 79.49% |
|            | Non-aes3    | 13,690,299         | 10,872,355        | 79.42% |
|            | Early-aes1  | 22,241,524         | 16,852,828        | 75.77% |
|            | Early-aes2  | 28,731,643         | 22,512,961        | 78.36% |
|            | Early-aes3  | 21,893,195         | 17,284,719        | 78.95% |
|            | Aes1        | 22,381,445         | 18,365,960        | 82.06% |
|            | Aes2        | 20,875,229         | 16,556,455        | 79.31% |
|            | Aes3        | 21,890,400         | 17,718,244        | 80.94% |
|            | Aro1        | 19,333,443         | 15,555,919        | 80.46% |
| Aro2       | 21,872,984  | 17,504,817         | 80.02%            |        |
| Aro3       | 22,638,405  | 18,391,890         | 81.24%            |        |
| BodyWall   | Non-aes1    | 19,778,088         | 15,703,378        | 79.40% |
|            | Non-aes2    | 16,322,903         | 13,193,106        | 80.82% |
|            | Non-aes3    | 17,535,996         | 13,801,391        | 78.70% |
|            | Early-aes1  | 24,645,521         | 18,785,579        | 76.22% |
|            | Early-aes2  | 20,376,260         | 15,909,496        | 78.08% |
|            | Aes1        | 18,351,474         | 14,354,912        | 78.22% |
|            | Aes2        | 21,950,210         | 17,556,001        | 79.98% |
|            | Aro1        | 24,120,910         | 19,970,096        | 82.79% |
|            | Aro2        | 15,409,135         | 12,406,727        | 80.52% |
|            | Non-aes1    | 23,304,185         | 19,374,150        | 83.13% |
| Non-aes2   | 22,162,383  | 18,307,148         | 82.61%            |        |
| Early-aes1 | 19,824,535  | 16,397,419         | 82.72%            |        |
| Early-aes2 | 22,300,307  | 18,625,664         | 83.53%            |        |
| Aes1       | 24,607,023  | 20,098,998         | 81.68%            |        |
| Aes2       | 16,935,644  | 14,478,369         | 85.49%            |        |
| Aro1       | 18,341,518  | 13,228,824         | 72.12%            |        |
| Aro2       | 22,968,284  | 18,927,828         | 82.41%            |        |

**Table S21 Summary of differentially expressed genes (DEGs) in all four organs during aestivation.**

*See the separate Excel file.*

**Table S22 GO enrichment analysis of differentially expressed genes in body wall during sea cucumber aestivation.**

| GO_ID      | GO_Term                                                      | GO Class | GO level | Pvalue   | Adjusted Pv |
|------------|--------------------------------------------------------------|----------|----------|----------|-------------|
| GO:0001539 | ciliary or bacterial-type flagellar motility                 | BP       | 4        | 5.67E-06 | 0.000799    |
| GO:0007155 | cell adhesion                                                | BP       | 3        | 1.69E-05 | 0.001964    |
| GO:0048856 | anatomical structure development                             | BP       | 3        | 3.32E-05 | 0.003441    |
| GO:0032502 | developmental process                                        | BP       | 2        | 6.03E-05 | 0.005581    |
| GO:0002685 | regulation of leukocyte migration                            | BP       | 4        | 0.000145 | 0.011868    |
| GO:0044707 | single-multicellular organism process                        | BP       | 3        | 0.000207 | 0.015611    |
| GO:0097529 | myeloid leukocyte migration                                  | BP       | 4        | 0.000227 | 0.01682     |
| GO:0003341 | cilium movement                                              | BP       | 6        | 0.000235 | 0.01728     |
| GO:0006865 | amino acid transport                                         | BP       | 5        | 0.000246 | 0.017941    |
| GO:0046942 | carboxylic acid transport                                    | BP       | 5        | 0.000287 | 0.019748    |
| GO:0015711 | organic anion transport                                      | BP       | 5        | 0.000323 | 0.021691    |
| GO:0009581 | detection of external stimulus                               | BP       | 4        | 0.000328 | 0.021691    |
| GO:0002688 | regulation of leukocyte chemotaxis                           | BP       | 5        | 0.000332 | 0.021777    |
| GO:0070286 | axonemal dynein complex assembly                             | BP       | 7        | 0.000407 | 0.024657    |
| GO:0030595 | leukocyte chemotaxis                                         | BP       | 4        | 0.000407 | 0.024657    |
| GO:0044767 | single-organism developmental process                        | BP       | 3        | 0.000424 | 0.025478    |
| GO:0036159 | inner dynein arm assembly                                    | BP       | 8        | 0.000575 | 0.032734    |
| GO:0048771 | tissue remodeling                                            | BP       | 4        | 0.000603 | 0.033517    |
| GO:0006811 | ion transport                                                | BP       | 4        | 0.000603 | 0.033517    |
| GO:0003008 | system process                                               | BP       | 4        | 0.000662 | 0.03536     |
| GO:0032501 | multicellular organismal process                             | BP       | 2        | 0.000676 | 0.03566     |
| GO:0016601 | Rac protein signal transduction                              | BP       | 8        | 0.000733 | 0.037842    |
| GO:0002690 | positive regulation of leukocyte chemotaxis                  | BP       | 5        | 0.000735 | 0.037842    |
| GO:0020028 | hemoglobin import                                            | BP       | 5        | 0.00081  | 0.040031    |
| GO:0009182 | purine deoxyribonucleoside diphosphate metabolic process     | BP       | 8        | 0.00081  | 0.040031    |
| GO:0009216 | purine deoxyribonucleoside triphosphate biosynthetic process | BP       | 8        | 0.00081  | 0.040031    |
| GO:0090022 | regulation of neutrophil chemotaxis                          | BP       | 6        | 0.00081  | 0.040031    |
| GO:0030239 | myofibril assembly                                           | BP       | 5        | 0.00085  | 0.041534    |
| GO:0060326 | cell chemotaxis                                              | BP       | 5        | 0.00095  | 0.045774    |
| GO:0046849 | bone remodeling                                              | BP       | 5        | 0.001005 | 0.047774    |
| GO:0005576 | extracellular region                                         | CC       | 2        | 1.24E-09 | 3.05E-07    |
| GO:0030286 | dynein complex                                               | CC       | 5        | 1.83E-09 | 4.38E-07    |
| GO:0044447 | axoneme part                                                 | CC       | 4        | 2.73E-08 | 5.73E-06    |

---

|            |                                  |    |   |          |          |
|------------|----------------------------------|----|---|----------|----------|
| GO:0005858 | axonemal dynein complex          | CC | 5 | 3.74E-08 | 7.65E-06 |
| GO:0005868 | cytoplasmic dynein complex       | CC | 5 | 3.09E-07 | 5.79E-05 |
| GO:0044421 | extracellular region part        | CC | 2 | 1.06E-05 | 0.001318 |
| GO:0036156 | inner dynein arm                 | CC | 6 | 2.71E-05 | 0.002914 |
| GO:0005875 | microtubule associated complex   | CC | 4 | 3.51E-05 | 0.003554 |
| GO:0032838 | cell projection cytoplasm        | CC | 4 | 4.01E-05 | 0.003923 |
| GO:0005930 | axoneme                          | CC | 4 | 8.64E-05 | 0.007364 |
| GO:0031012 | extracellular matrix             | CC | 2 | 0.000159 | 0.012893 |
| GO:0044459 | plasma membrane part             | CC | 3 | 0.000253 | 0.018166 |
| GO:0005886 | plasma membrane                  | CC | 3 | 0.000372 | 0.02304  |
| GO:0005912 | adherens junction                | CC | 4 | 0.00054  | 0.030983 |
| GO:0071944 | cell periphery                   | CC | 3 | 0.000662 | 0.03536  |
| GO:0030670 | phagocytic vesicle membrane      | CC | 6 | 0.000733 | 0.037842 |
| GO:0001891 | phagocytic cup                   | CC | 4 | 0.00081  | 0.040031 |
| GO:0033017 | sarcoplasmic reticulum membrane  | CC | 5 | 0.000885 | 0.042996 |
| GO:0003774 | motor activity                   | MF | 8 | 0.000259 | 0.018402 |
| GO:0003777 | microtubule motor activity       | MF | 9 | 0.000292 | 0.019946 |
| GO:0030492 | hemoglobin binding               | MF | 4 | 0.00081  | 0.040031 |
| GO:0042954 | lipoprotein transporter activity | MF | 5 | 0.00081  | 0.040031 |

---

**Table S23 GO enrichment analysis of differentially expressed genes in intestine during sea cucumber aestivation.**

| GO_ID      | GO_Term                                        | GO Class | GO level | Pvalue   | Adjusted Pv |
|------------|------------------------------------------------|----------|----------|----------|-------------|
| GO:0006629 | lipid metabolic process                        | BP       | 4        | 4.77E-10 | 2.76E-07    |
| GO:0006082 | organic acid metabolic process                 | BP       | 4        | 8.68E-09 | 3.24E-06    |
| GO:0001523 | retinoid metabolic process                     | BP       | 8        | 2.62E-08 | 8.27E-06    |
| GO:0019752 | carboxylic acid metabolic process              | BP       | 6        | 2.92E-08 | 8.80E-06    |
| GO:0006631 | fatty acid metabolic process                   | BP       | 5        | 5.58E-08 | 1.61E-05    |
| GO:0044255 | cellular lipid metabolic process               | BP       | 4        | 7.66E-08 | 1.97E-05    |
| GO:0043436 | oxoacid metabolic process                      | BP       | 5        | 1.13E-07 | 2.81E-05    |
| GO:0032787 | monocarboxylic acid metabolic process          | BP       | 7        | 5.76E-07 | 0.000105    |
| GO:0034754 | cellular hormone metabolic process             | BP       | 4        | 6.36E-06 | 0.000958    |
| GO:0010876 | lipid localization                             | BP       | 4        | 8.91E-06 | 0.001287    |
| GO:0001676 | long-chain fatty acid metabolic process        | BP       | 6        | 1.72E-05 | 0.00225     |
| GO:0015908 | fatty acid transport                           | BP       | 5        | 1.91E-05 | 0.002413    |
| GO:0033559 | unsaturated fatty acid metabolic process       | BP       | 6        | 2.05E-05 | 0.002533    |
| GO:0042572 | retinol metabolic process                      | BP       | 5        | 2.76E-05 | 0.003303    |
| GO:0006869 | lipid transport                                | BP       | 4        | 4.67E-05 | 0.005491    |
| GO:0009074 | aromatic amino acid family catabolic process   | BP       | 6        | 6.43E-05 | 0.006968    |
| GO:0044281 | small molecule metabolic process               | BP       | 4        | 0.000118 | 0.012074    |
| GO:0006720 | isoprenoid metabolic process                   | BP       | 5        | 0.000201 | 0.019131    |
| GO:0015718 | monocarboxylic acid transport                  | BP       | 6        | 0.000246 | 0.023019    |
| GO:0070266 | necroptotic process                            | BP       | 7        | 0.000289 | 0.025645    |
| GO:0015909 | long-chain fatty acid transport                | BP       | 6        | 0.000289 | 0.025645    |
| GO:0006790 | sulfur compound metabolic process              | BP       | 4        | 0.000324 | 0.028082    |
| GO:0097300 | programmed necrotic cell death                 | BP       | 6        | 0.00034  | 0.028725    |
| GO:0042445 | hormone metabolic process                      | BP       | 3        | 0.000418 | 0.033342    |
| GO:0016115 | terpenoid catabolic process                    | BP       | 7        | 0.000429 | 0.033781    |
| GO:0045834 | positive regulation of lipid metabolic process | BP       | 4        | 0.000521 | 0.03966     |
| GO:0009066 | aspartate family amino acid metabolic process  | BP       | 6        | 0.000578 | 0.043084    |
| GO:0044710 | single-organism metabolic process              | BP       | 3        | 0.000693 | 0.049521    |
| GO:0031526 | brush border membrane                          | CC       | 5        | 0.000199 | 0.019131    |
| GO:0004622 | lysophospholipase activity                     | MF       | 6        | 2.16E-06 | 0.000356    |
| GO:0004620 | phospholipase activity                         | MF       | 6        | 2.78E-06 | 0.000448    |

---

|            |                                                                                                                                                                           |    |   |          |          |
|------------|---------------------------------------------------------------------------------------------------------------------------------------------------------------------------|----|---|----------|----------|
| GO:0016491 | oxidoreductase activity                                                                                                                                                   | MF | 3 | 1.39E-05 | 0.001893 |
| GO:0016298 | lipase activity                                                                                                                                                           | MF | 5 | 1.86E-05 | 0.002382 |
| GO:0016725 | oxidoreductase activity, acting on<br>CH or CH2 groups                                                                                                                    | MF | 4 | 0.000104 | 0.011077 |
| GO:0016717 | oxidoreductase activity, acting on<br>paired donors, with oxidation of a<br>pair of donors resulting in the<br>reduction of molecular oxygen to<br>two molecules of water | MF | 5 | 0.00037  | 0.029862 |
| GO:0050253 | retinyl-palmitate esterase activity                                                                                                                                       | MF | 6 | 0.000502 | 0.038695 |

---

**Table S24 GO enrichment analysis of differentially expressed genes in muscle during sea cucumber aestivation.**

| GO_ID      | GO_Term                                                  | GO Class | GO level | Pvalue   | Adjusted Pv |
|------------|----------------------------------------------------------|----------|----------|----------|-------------|
| GO:0030317 | sperm motility                                           | BP       | 4        | 4.33E-07 | 0.000583    |
| GO:0070286 | axonemal dynein complex assembly                         | BP       | 7        | 5.13E-05 | 0.025894    |
| GO:0021831 | embryonic olfactory bulb interneuron precursor migration | BP       | 6        | 9.52E-05 | 0.03663     |
| GO:0006956 | complement activation                                    | BP       | 4        | 0.000133 | 0.044863    |
| GO:0043277 | apoptotic cell clearance                                 | BP       | 5        | 0.000176 | 0.047431    |
| GO:0030286 | dynein complex                                           | CC       | 5        | 2.26E-09 | 1.83E-05    |
| GO:0005858 | axonemal dynein complex                                  | CC       | 5        | 7.85E-09 | 3.17E-05    |
| GO:0005868 | cytoplasmic dynein complex                               | CC       | 5        | 6.05E-08 | 0.000122    |
| GO:0031012 | extracellular matrix                                     | CC       | 2        | 2.17E-07 | 0.00035     |
| GO:0005578 | proteinaceous extracellular matrix                       | CC       | 3        | 1.04E-06 | 0.001206    |
| GO:0005576 | extracellular region                                     | CC       | 2        | 4.37E-06 | 0.004412    |
| GO:0005605 | basal lamina                                             | CC       | 3        | 7.48E-06 | 0.006717    |
| GO:0044420 | extracellular matrix part                                | CC       | 2        | 2.55E-05 | 0.019668    |
| GO:0036157 | outer dynein arm                                         | CC       | 6        | 3.16E-05 | 0.019668    |
| GO:0042575 | DNA polymerase complex                                   | CC       | 4        | 3.16E-05 | 0.019668    |
| GO:0003777 | microtubule motor activity                               | MF       | 9        | 5.07E-05 | 0.025894    |

**Table S25 GO enrichment analysis of differentially expressed genes in respiratory tree during sea cucumber aestivation.**

| GO_ID      | GO_Term                                        | GO Class | GO level | Pvalue   | AdjustedP<br>v |
|------------|------------------------------------------------|----------|----------|----------|----------------|
| GO:0042572 | retinol metabolic process                      | BP       | 5        | 1.36E-05 | 0.001417       |
| GO:0050778 | positive regulation of immune response         | BP       | 4        | 1.82E-05 | 0.001825       |
| GO:0002253 | activation of immune response                  | BP       | 3        | 1.98E-05 | 0.001964       |
| GO:0001867 | complement activation, lectin pathway          | BP       | 5        | 3.39E-05 | 0.00309        |
| GO:0042445 | hormone metabolic process                      | BP       | 3        | 7.03E-05 | 0.005752       |
| GO:0006959 | humoral immune response                        | BP       | 4        | 8.82E-05 | 0.006999       |
| GO:0002221 | pattern recognition receptor signaling pathway | BP       | 6        | 0.000129 | 0.009326       |
| GO:0006956 | complement activation                          | BP       | 4        | 0.000234 | 0.016292       |
| GO:0030261 | chromosome condensation                        | BP       | 4        | 0.000317 | 0.021133       |
| GO:0020028 | hemoglobin import                              | BP       | 5        | 0.000385 | 0.024627       |
| GO:0097070 | ductus arteriosus closure                      | BP       | 6        | 0.000385 | 0.024627       |
| GO:0044699 | single-organism process                        | BP       | 2        | 0.000482 | 0.029659       |
| GO:0048844 | artery morphogenesis                           | BP       | 5        | 0.000781 | 0.044589       |
| GO:0060840 | artery development                             | BP       | 5        | 0.000843 | 0.047158       |
| GO:0002224 | toll-like receptor signaling pathway           | BP       | 7        | 0.000888 | 0.048976       |
| GO:0031526 | brush border membrane                          | CC       | 5        | 1.52E-07 | 2.81E-05       |
| GO:0045177 | apical part of cell                            | CC       | 3        | 5.25E-07 | 7.72E-05       |
| GO:0016324 | apical plasma membrane                         | CC       | 4        | 6.66E-07 | 9.44E-05       |
| GO:0005903 | brush border                                   | CC       | 4        | 1.12E-05 | 0.001222       |
| GO:0009986 | cell surface                                   | CC       | 3        | 7.25E-05 | 0.005871       |
| GO:0098590 | plasma membrane region                         | CC       | 4        | 7.50E-05 | 0.006012       |
| GO:0005615 | extracellular space                            | CC       | 3        | 0.00012  | 0.008922       |
| GO:0005886 | plasma membrane                                | CC       | 3        | 0.000624 | 0.037256       |
| GO:0050253 | retinyl-palmitate esterase activity            | MF       | 6        | 2.52E-05 | 0.002406       |
| GO:0004623 | phospholipase A2 activity                      | MF       | 6        | 0.000103 | 0.007993       |
| GO:0030492 | hemoglobin binding                             | MF       | 4        | 0.000385 | 0.024627       |
| GO:0042954 | lipoprotein transporter activity               | MF       | 5        | 0.000385 | 0.024627       |
| GO:0016491 | oxidoreductase activity                        | MF       | 3        | 0.000396 | 0.025123       |
| GO:0004622 | lysophospholipase activity                     | MF       | 6        | 0.000509 | 0.031104       |
| GO:0004872 | receptor activity                              | MF       | 2        | 0.000805 | 0.045341       |



**Table S26 Primer sequences used for quantitative PCR validation.**

| Gene symbol  | Primer sequences-F (5'–3') | Primer sequences-R (5'–3') |
|--------------|----------------------------|----------------------------|
| <i>Klf2</i>  | CCACCAGCCTTTACTCAGCAT      | GTGTTTGTGCAACCAATCCCT      |
| <i>Egr1</i>  | CCAAGCTCCTCGACACCAGT       | GGACTTCCACCCACGATAGACT     |
| <i>Clock</i> | ACTCATCGCGTCGTCAGCTA       | GAAATCTCGGACAGGCAACC       |
| <i>Bmal1</i> | GGTCAAGTCTGATGTGGCTCC      | TTGGTCCTCTGTCTTCACGATG     |
| <i>Cry1</i>  | TCAACTCCCGTCTGTTTCTGG      | CGGTTCGCAGTCTTCCTCA        |
| <i>Dpolm</i> | ACCTGACAGTGACATGCGACC      | AGCTCTGTCTGATTTACTTCGAGAT  |
| <i>Grb2</i>  | ATCTTTCACATATTGCGAGCCAG    | ATGACCATTCCGATGCCCTAA      |

**Table S27 Module enrichment analysis of overrepresented aestivation-related genes.**

| color | BodyWall-FDR | Muscle-FDR | Intestine-FDR | ResTree-FDR |
|-------|--------------|------------|---------------|-------------|
| AM7   | 5.58E-176    | 0.003894   | 1             | 9.21E-25    |
| AM2   | 1            | 0.998946   | 4.96E-106     | 1.80E-45    |
| AM3   | 1            | 0.998946   | 5.40E-11      | 2.19E-50    |
| AM6   | 1.05E-83     | 0.998946   | 1             | 1           |
| AM1   | 1            | 0.998946   | 1.52E-17      | 1           |
| AM4   | 1            | 0.201392   | 0.124178      | 5.03E-07    |
| AM8   | 1            | 0.003894   | 1             | 1           |
| AM5   | 1            | 0.998946   | 1             | 1           |
| AM9   | 1            | 0.998946   | 1             | 1           |
| AM10  | 1            | 0.998946   | 1             | 1           |

**Table S28 Summary of transcription factors in the AM7 network.**

| geneID    | Kwithin    | UNI_name    | UNI_Evalue | Number* |
|-----------|------------|-------------|------------|---------|
| AJ983.7   | 102.155384 | EGR1_XENTR  | 7E-59      | 4       |
| AJ2180.2  | 62.9801003 | KLF2_HUMAN  | 8E-49      | 4       |
| AJ537.29  | 23.202925  | NFE2_HUMAN  | 3E-44      | 4       |
| AJ4515.2  | 12.6726782 | AKR_CHICK   | 1E-24      | 4       |
| AJ130.28  | 83.308794  | CR3LA_DANRE | 6E-29      | 3       |
| AJ851.6   | 79.7816558 | RREB1_CHICK | 5E-49      | 3       |
| AJ4965.4  | 78.6657639 | ATF6A_HUMAN | 1E-38      | 3       |
| AJ3840.7  | 46.3973246 | PEBB_HUMAN  | 9E-65      | 3       |
| AJ594.9   | 34.309651  | ARID2_HUMAN | 2E-38      | 3       |
| AJ557.11  | 33.5340241 | CR3L3_RAT   | 3E-28      | 3       |
| AJ1073.2  | 32.6402878 | ZMIZ1_HUMAN | 4E-173     | 3       |
| AJ46.33   | 30.2624709 | SMBT2_HUMAN | 4E-125     | 3       |
| AJ870.41  | 2.62689747 | TYW1_DANRE  | 8E-46      | 3       |
| AJ285.14  | 139.086501 | EVI1_HUMAN  | 2E-62      | 2       |
| AJ894.16  | 91.0378344 | SOX14_DANRE | 4E-57      | 2       |
| AJ76.23   | 86.057176  | E75_CHOFU   | 5E-37      | 2       |
| AJ4977.11 | 85.0118334 | ALX4_HUMAN  | 8E-36      | 2       |
| AJ471.13  | 74.1701169 | HES1B_XENLA | 6E-27      | 2       |
| AJ5604.1  | 60.942267  | ARID2_HUMAN | 2E-29      | 2       |
| AJ6629.1  | 44.5984609 | SMRC2_HUMAN | 2E-165     | 2       |
| AJ1308.10 | 41.429722  | ARI1A_HUMAN | 4E-74      | 2       |
| AJ1747.17 | 41.1519435 | FOXN3_MOUSE | 7E-34      | 2       |
| AJ802.14  | 35.0149765 | NFIL3_HUMAN | 4E-20      | 2       |
| AJ1846.6  | 34.8873875 | ZN236_HUMAN | 1E-82      | 2       |
| AJ569.14  | 31.3568718 | MRF_HUMAN   | 3E-62      | 2       |
| AJ887.8   | 28.752419  | SMAD1_BOVIN | 0          | 2       |
| AJ4156.3  | 25.0529411 | PIAS3_RAT   | 6E-107     | 2       |
| AJ1911.1  | 21.164901  | EHF_BOVIN   | 1E-42      | 2       |
| AJ2469.6  | 18.7579821 | KDM5A_HUMAN | 2E-160     | 2       |
| AJ2422.1  | 16.5918688 | MLXIP_HUMAN | 9E-41      | 2       |
| AJ3658.3  | 16.258889  | NFAT5_RAT   | 5E-75      | 2       |
| AJ2443.1  | 12.4563674 | MLXPL_HUMAN | 8E-40      | 2       |
| AJ5725.1  | 11.3284555 | MLXPL_HUMAN | 1E-54      | 2       |
| AJ2372.8  | 11.117842  | LMBL1_CHICK | 3E-176     | 2       |
| AJ1095.19 | 8.35102751 | ATF2_CHICK  | 8E-38      | 2       |
| AJ1124.12 | 5.07291809 | GLAS_DROVI  | 1E-42      | 2       |
| AJ4517.4  | 181.142822 | NR5A2_HUMAN | 3E-47      | 1       |
| AJ1501.4  | 165.650824 | GFI1_RAT    | 5E-92      | 1       |
| AJ1108.7  | 136.348966 | NR1D2_MOUSE | 6E-35      | 1       |
| AJ5709.2  | 123.255669 | SP5_MOUSE   | 2E-55      | 1       |
| AJ1430.4  | 110.398337 | DIMM_DROME  | 5E-26      | 1       |

|           |            |              |        |   |
|-----------|------------|--------------|--------|---|
| AJ865.5   | 107.848433 | SNAI2_XENLA  | 2E-75  | 1 |
| AJ1393.7  | 98.9418945 | PTF1A_DANRE  | 1E-56  | 1 |
| AJ4301.2  | 90.6951866 | BARH2_HUMAN  | 3E-33  | 1 |
| AJ1359.13 | 78.9661132 | RXRRAA_DANRE | 7E-61  | 1 |
| AJ4320.7  | 77.5490054 | HHEX_PATMI   | 8E-34  | 1 |
| AJ3034.11 | 66.7440243 | CAN5_HUMAN   | 0      | 1 |
| AJ673.21  | 33.7768205 | NFKB1_HUMAN  | 5E-70  | 1 |
| AJ1171.8  | 30.3498158 | SHR2_STRPU   | 1E-69  | 1 |
| AJ3106.4  | 28.6721018 | CREM_CANFA   | 8E-59  | 1 |
| AJ1262.8  | 27.5227391 | SIX1B_DANRE  | 1E-121 | 1 |
| AJ2539.7  | 25.0415104 | KDM5D_HUMAN  | 0      | 1 |
| AJ4035.19 | 23.8302391 | PB1_HUMAN    | 0      | 1 |
| AJ1603.1  | 20.2605683 | MLXPL_RAT    | 2E-25  | 1 |
| AJ1132.6  | 18.8888162 | FOXO_DROAN   | 2E-63  | 1 |
| AJ2257.2  | 15.1754867 | SHR2_STRPU   | 1E-167 | 1 |
| AJ2257.3  | 11.9657272 | SHR2_STRPU   | 4E-68  | 1 |
| AJ718.19  | 10.4299196 | KLF11_HUMAN  | 3E-63  | 1 |
| AJ1247.1  | 163.244814 | PO4F3_MOUSE  | 6E-93  | 0 |
| AJ1961.1  | 151.145909 | ZNF79_HUMAN  | 1E-63  | 0 |
| AJ2365.1  | 86.4550165 | RARB_COTJA   | 1E-52  | 0 |
| AJ6525.1  | 36.0726915 | MTA1_HUMAN   | 0      | 0 |
| AJ1939.3  | 26.9123664 | ZEB2_MOUSE   | 3E-44  | 0 |
| AJ845.3   | 24.8692768 | MYT1L_MOUSE  | 5E-46  | 0 |
| AJ4529.9  | 23.2807463 | ZNF14_PONAB  | 5E-93  | 0 |
| AJ240.16  | 20.5370093 | RERE_HUMAN   | 5E-166 | 0 |
| AJ876.9   | 18.600375  | MIER1_XENLA  | 3E-70  | 0 |
| AJ379.9   | 17.889244  | ZN271_PONAB  | 8E-124 | 0 |
| AJ4235.1  | 11.427742  | XBP1_MOUSE   | 9E-27  | 0 |
| AJ2849.4  | 11.4038415 | ZN454_HUMAN  | 1E-32  | 0 |
| AJ2880.2  | 10.0449635 | SUH_BOVIN    | 3E-176 | 0 |
| AJ5242.5  | 9.40795982 | HMBX1_HUMAN  | 7E-24  | 0 |
| AJ161.16  | 7.67531538 | ZFP2_HUMAN   | 5E-71  | 0 |
| AJ2283.9  | 7.16939206 | ZBED4_HUMAN  | 5E-30  | 0 |
| AJ851.5   | 6.85506123 | ZN341_HUMAN  | 2E-77  | 0 |
| AJ195.18  | 6.75262249 | USF2_RAT     | 9E-75  | 0 |
| AJ5868.1  | 5.84162192 | PMS1_HUMAN   | 1E-97  | 0 |

\*Number in this column shows how many organs these TFs are differentially expressed in during aestivation.

**Table S29 KEGG enrichment analysis of AM7.**

| MapID    | MapTitle                                         | Pvalue   | AdjustedPv | DEGs Ratio |
|----------|--------------------------------------------------|----------|------------|------------|
| map04330 | Notch signaling pathway                          | 8.22E-19 | 2.32E-16   | 0.94       |
| map04320 | Dorso-ventral axis formation                     | 5.55E-18 | 7.83E-16   | 0.90       |
| map04919 | Thyroid hormone signaling pathway                | 2.16E-16 | 2.03E-14   | 0.86       |
| map04670 | Leukocyte transendothelial migration             | 6.48E-11 | 3.66E-09   | 0.82       |
| map04360 | Axon guidance                                    | 2.42E-09 | 1.14E-07   | 0.80       |
| map04141 | Protein processing in endoplasmic reticulum      | 1.41E-07 | 4.43E-06   | 0.72       |
| map04062 | Chemokine signaling pathway                      | 2.34E-06 | 5.49E-05   | 0.73       |
| map04630 | Jak-STAT signaling pathway                       | 3.06E-06 | 6.65E-05   | 0.71       |
| map04610 | Complement and coagulation cascades              | 5.45E-05 | 0.001098   | 0.73       |
| map04520 | Adherens junction                                | 9.25E-05 | 0.001631   | 0.84       |
| map04510 | Focal adhesion                                   | 0.000119 | 0.001972   | 0.85       |
| map04151 | PI3K-Akt signaling pathway                       | 0.000168 | 0.002355   | 0.80       |
| map04970 | Salivary secretion                               | 0.000175 | 0.002355   | 0.89       |
| map04810 | Regulation of actin cytoskeleton                 | 0.000202 | 0.002586   | 0.75       |
| map04012 | ErbB signaling pathway                           | 0.000253 | 0.002857   | 0.63       |
| map00534 | Glycosaminoglycan biosynthesis - heparan sulfate | 0.000496 | 0.005176   | 0.55       |
| map05202 | Transcriptional misregulation in cancer          | 0.000671 | 0.006524   | 0.68       |
| map04514 | Cell adhesion molecules (CAMs)                   | 0.000978 | 0.008622   | 0.78       |
| map04722 | Neurotrophin signaling pathway                   | 0.001021 | 0.008725   | 0.72       |
| map05200 | Pathways in cancer                               | 0.001126 | 0.009338   | 0.69       |
| map04015 | Rap1 signaling pathway                           | 0.001235 | 0.009953   | 0.78       |
| map04620 | Toll-like receptor signaling pathway             | 0.002217 | 0.014539   | 0.61       |
| map00513 | High-mannose type N-glycan biosynthesis          | 0.0027   | 0.016919   | 0.59       |
| map04668 | TNF signaling pathway                            | 0.00282  | 0.016921   | 0.73       |
| map04380 | Osteoclast differentiation                       | 0.00282  | 0.016921   | 0.64       |
| map04740 | Olfactory transduction                           | 0.003207 | 0.018839   | 0.87       |
| map04370 | VEGF signaling pathway                           | 0.004025 | 0.02174    | 0.81       |
| map04918 | Thyroid hormone synthesis                        | 0.004086 | 0.02174    | 0.71       |
| map04014 | Ras signaling pathway                            | 0.004734 | 0.023838   | 0.76       |
| map04662 | B cell receptor signaling pathway                | 0.007345 | 0.034522   | 0.86       |
| map04917 | Prolactin signaling pathway                      | 0.007345 | 0.034522   | 0.64       |
| map04664 | Fc epsilon RI signaling pathway                  | 0.008975 | 0.040175   | 0.77       |
| map05215 | Prostate cancer                                  | 0.011432 | 0.048844   | 0.63       |

**Table S30 Summary of hyper-methylated genes (HMGs) in intestine during sea cucumber aestivation.**

*See the separate Excel file.*

**Table S31 Summary of RNA-seq data from various stages of intestine regeneration.**

|       | Total reads | Total mapped reads | Mapped percentage |
|-------|-------------|--------------------|-------------------|
| 0d-1  | 25,690,760  | 20,621,818         | 80.27%            |
| 0d-2  | 25,659,527  | 20,698,623         | 80.67%            |
| 0d-3  | 24,157,739  | 19,853,535         | 82.19%            |
| 10d-1 | 31,413,872  | 25,669,338         | 81.71%            |
| 10d-2 | 22,330,288  | 15,720,336         | 70.39%            |
| 10d-3 | 21,256,361  | 17,385,910         | 81.79%            |
| 20d-1 | 21,851,466  | 18,565,031         | 84.96%            |
| 20d-2 | 36,231,981  | 30,457,686         | 84.06%            |

**Table S32 Summary of DEGs during intestine regeneration.**

*See the separate Excel file.*



**Table S33 GO enrichment analysis of intestine regeneration-related DEGs.**

| GO_ID      | GO_Term                                                | GO_Class | Pvalue   | AdjustedPv |
|------------|--------------------------------------------------------|----------|----------|------------|
| GO:0016043 | cellular component organization                        | BP       | 1.73E-08 | 9.47E-07   |
| GO:0033036 | macromolecule localization                             | BP       | 8.51E-07 | 3.26E-05   |
| GO:0006996 | organelle organization                                 | BP       | 1.26E-06 | 4.40E-05   |
| GO:0045184 | establishment of protein localization                  | BP       | 4.67E-05 | 0.001165   |
| GO:0044767 | single-organism developmental process                  | BP       | 4.87E-05 | 0.001165   |
| GO:0016049 | cell growth                                            | BP       | 0.0001   | 0.002136   |
| GO:0065009 | regulation of molecular function                       | BP       | 0.000159 | 0.003048   |
| GO:0048856 | anatomical structure development                       | BP       | 0.000325 | 0.005934   |
| GO:0044707 | single-multicellular organism process                  | BP       | 0.0005   | 0.008711   |
| GO:0042445 | hormone metabolic process                              | BP       | 0.000966 | 0.014935   |
| GO:0051129 | negative regulation of cellular component organization | BP       | 0.00131  | 0.018576   |
| GO:0019882 | antigen processing and presentation                    | BP       | 0.002087 | 0.025787   |
| GO:0051130 | positive regulation of cellular component organization | BP       | 0.002758 | 0.03232    |
| GO:0035265 | organ growth                                           | BP       | 0.002785 | 0.03232    |
| GO:0051128 | regulation of cellular component organization          | BP       | 0.003099 | 0.034914   |
| GO:0009653 | anatomical structure morphogenesis                     | BP       | 0.003301 | 0.036117   |
| GO:0051641 | cellular localization                                  | BP       | 0.003545 | 0.037719   |
| GO:0009605 | response to external stimulus                          | BP       | 0.004421 | 0.043301   |
| GO:0050794 | regulation of cellular process                         | BP       | 0.004522 | 0.043301   |
| GO:0050789 | regulation of biological process                       | BP       | 0.004522 | 0.043301   |
| GO:0031982 | vesicle                                                | CC       | 1.71E-11 | 6.54E-09   |
| GO:0070161 | anchoring junction                                     | CC       | 6.66E-11 | 1.28E-08   |
| GO:0043230 | extracellular organelle                                | CC       | 1.08E-09 | 1.30E-07   |
| GO:0012505 | endomembrane system                                    | CC       | 1.35E-09 | 1.30E-07   |
| GO:0030055 | cell-substrate junction                                | CC       | 2.85E-09 | 2.19E-07   |
| GO:0044421 | extracellular region part                              | CC       | 9.60E-08 | 4.60E-06   |
| GO:0044449 | contractile fiber part                                 | CC       | 5.24E-07 | 2.23E-05   |
| GO:0044424 | intracellular part                                     | CC       | 3.63E-06 | 0.000116   |
| GO:0005911 | cell-cell junction                                     | CC       | 3.93E-06 | 0.000116   |
| GO:0005886 | plasma membrane                                        | CC       | 2.02E-05 | 0.000553   |
| GO:0045177 | apical part of cell                                    | CC       | 6.40E-05 | 0.001442   |
| GO:0044464 | cell part                                              | CC       | 0.000115 | 0.002326   |

---

|            |                            |    |          |          |
|------------|----------------------------|----|----------|----------|
| GO:0043227 | membrane-bounded organelle | CC | 0.000798 | 0.013288 |
| GO:0030904 | retromer complex           | CC | 0.000975 | 0.014935 |
| GO:0005604 | basement membrane          | CC | 0.001659 | 0.021911 |
| GO:0043229 | intracellular organelle    | CC | 0.001984 | 0.025332 |
| GO:0005515 | protein binding            | MF | 6.26E-09 | 4.00E-07 |
| GO:0008289 | lipid binding              | MF | 0.001131 | 0.016663 |
| GO:0016787 | hydrolase activity         | MF | 0.00141  | 0.019281 |

---

**Table S34 Module enrichment analysis of intestine regeneration-related genes.**

| Module color | Module size | Number of DEGs in the module | Ratio    | Hyper     | FDR       |
|--------------|-------------|------------------------------|----------|-----------|-----------|
| RM7          | 3562        | 2729                         | 0.766143 | 0         | 0         |
| RM8          | 2427        | 1568                         | 0.646065 | 2.84E-116 | 1.28E-115 |
| RM6          | 1911        | 703                          | 0.36787  | 1         | 1         |
| RM4          | 395         | 138                          | 0.349367 | 0.999804  | 1         |
| RM9          | 1328        | 422                          | 0.317771 | 1         | 1         |
| RM10         | 671         | 192                          | 0.28614  | 1         | 1         |
| RM5          | 1444        | 382                          | 0.264543 | 1         | 1         |
| RM3          | 694         | 125                          | 0.180115 | 1         | 1         |
| RM2          | 1175        | 168                          | 0.142979 | 1         | 1         |
| RM1          | 1377        | 84                           | 0.061002 | 1         | 1         |

**Table S35 KEGG enrichment analysis of the intestine regeneration-related module RM7.**

| ID       | MapTitle                                               | Pvalue   | AdjustedPv |
|----------|--------------------------------------------------------|----------|------------|
| map04510 | Focal adhesion                                         | 9.95E-23 | 2.91E-20   |
| map04810 | Regulation of actin cytoskeleton                       | 1.49E-17 | 2.18E-15   |
| map04512 | ECM-receptor interaction                               | 8.65E-14 | 6.31E-12   |
| map04670 | Leukocyte transendothelial migration                   | 1.36E-13 | 7.93E-12   |
| map05205 | Proteoglycans in cancer                                | 1.15E-11 | 5.60E-10   |
| map04151 | PI3K-Akt signaling pathway                             | 2.83E-11 | 1.18E-09   |
| map05222 | Small cell lung cancer                                 | 6.74E-10 | 2.46E-08   |
| map04530 | Tight junction                                         | 1.10E-09 | 3.57E-08   |
| map05200 | Pathways in cancer                                     | 3.51E-09 | 9.56E-08   |
| map04062 | Chemokine signaling pathway                            | 3.60E-09 | 9.56E-08   |
| map04722 | Neurotrophin signaling pathway                         | 1.77E-07 | 3.45E-06   |
| map04012 | ErbB signaling pathway                                 | 3.35E-07 | 6.11E-06   |
| map04520 | Adherens junction                                      | 5.24E-07 | 8.93E-06   |
| map04391 | Hippo signaling pathway - fly                          | 5.51E-07 | 8.93E-06   |
| map05212 | Pancreatic cancer                                      | 6.12E-07 | 9.41E-06   |
| map05210 | Colorectal cancer                                      | 6.49E-07 | 9.47E-06   |
| map04360 | Axon guidance                                          | 1.92E-06 | 2.43E-05   |
| map05203 | Viral carcinogenesis                                   | 3.83E-06 | 4.48E-05   |
| map04068 | FoxO signaling pathway                                 | 5.39E-06 | 5.83E-05   |
| map04152 | AMPK signaling pathway                                 | 5.82E-06 | 6.07E-05   |
| map04015 | Rap1 signaling pathway                                 | 9.43E-06 | 9.49E-05   |
| map05220 | Chronic myeloid leukemia                               | 1.38E-05 | 0.000134   |
| map05410 | Hypertrophic cardiomyopathy (HCM)                      | 2.02E-05 | 0.000184   |
| map04310 | Wnt signaling pathway                                  | 2.50E-05 | 0.000207   |
| map04611 | Platelet activation                                    | 2.56E-05 | 0.000207   |
| map05414 | Dilated cardiomyopathy                                 | 3.16E-05 | 0.000249   |
| map04071 | Sphingolipid signaling pathway                         | 3.29E-05 | 0.000253   |
| map04370 | VEGF signaling pathway                                 | 5.14E-05 | 0.000375   |
| map04660 | T cell receptor signaling pathway                      | 6.15E-05 | 0.000438   |
| map05214 | Glioma                                                 | 7.10E-05 | 0.000494   |
| map04150 | mTOR signaling pathway                                 | 0.000129 | 0.000875   |
| map04014 | Ras signaling pathway                                  | 0.00016  | 0.001064   |
| map05412 | Arrhythmogenic right ventricular cardiomyopathy (ARVC) | 0.000175 | 0.001136   |
| map04261 | Adrenergic signaling in cardiomyocytes                 | 0.000208 | 0.001322   |
| map04930 | Type II diabetes mellitus                              | 0.000217 | 0.001347   |
| map04917 | Prolactin signaling pathway                            | 0.000223 | 0.001359   |
| map05215 | Prostate cancer                                        | 0.000283 | 0.001656   |
| map04380 | Osteoclast differentiation                             | 0.000289 | 0.001656   |
| map04960 | Aldosterone-regulated sodium reabsorption              | 0.000305 | 0.001695   |

---

|          |                                           |          |          |
|----------|-------------------------------------------|----------|----------|
| map04650 | Natural killer cell mediated cytotoxicity | 0.000308 | 0.001695 |
| map04978 | Mineral absorption                        | 0.000392 | 0.002081 |
| map05213 | Endometrial cancer                        | 0.000499 | 0.002601 |
| map04662 | B cell receptor signaling pathway         | 0.000898 | 0.004445 |
| map04910 | Insulin signaling pathway                 | 0.001022 | 0.004974 |
| map05231 | Choline metabolism in cancer              | 0.001315 | 0.006296 |
| map05166 | HTLV-I infection                          | 0.00144  | 0.006781 |
| map05223 | Non-small cell lung cancer                | 0.001903 | 0.008822 |
| map04620 | Toll-like receptor signaling pathway      | 0.002086 | 0.009371 |
| map00030 | Pentose phosphate pathway                 | 0.002153 | 0.009526 |
| map04514 | Cell adhesion molecules (CAMs)            | 0.002222 | 0.009683 |
| map05218 | Melanoma                                  | 0.002868 | 0.012136 |
| map04390 | Hippo signaling pathway                   | 0.003172 | 0.012862 |
| map04142 | Lysosome                                  | 0.005047 | 0.019915 |
| map04668 | TNF signaling pathway                     | 0.005504 | 0.020872 |
| map04666 | Fc gamma R-mediated phagocytosis          | 0.005504 | 0.020872 |
| map04070 | Phosphatidylinositol signaling system     | 0.007981 | 0.029879 |
| map05211 | Renal cell carcinoma                      | 0.008587 | 0.031341 |
| map05221 | Acute myeloid leukemia                    | 0.008985 | 0.032389 |
| map04022 | cGMP-PKG signaling pathway                | 0.010003 | 0.035192 |
| map04120 | Ubiquitin mediated proteolysis            | 0.011336 | 0.039405 |
| map05014 | Amyotrophic lateral sclerosis (ALS)       | 0.011757 | 0.04039  |
| map04630 | Jak-STAT signaling pathway                | 0.012562 | 0.042651 |
| map00562 | Inositol phosphate metabolism             | 0.015026 | 0.049858 |

---

**Table S36 KEGG enrichment analysis of in the intestine regeneration-related module RM8.**

| ID       | MapTitle                                                   | Pvalue   | AdjustedPv |
|----------|------------------------------------------------------------|----------|------------|
| map04146 | Peroxisome                                                 | 1.33E-12 | 4.25E-10   |
| map00071 | Fatty acid degradation                                     | 3.24E-08 | 5.17E-06   |
| map01230 | Biosynthesis of amino acids                                | 9.23E-08 | 9.82E-06   |
| map01212 | Fatty acid metabolism                                      | 4.47E-07 | 3.57E-05   |
| map03320 | PPAR signaling pathway                                     | 1.02E-06 | 5.42E-05   |
| map00360 | Phenylalanine metabolism                                   | 7.39E-06 | 0.000262   |
| map00020 | Citrate cycle (TCA cycle)                                  | 1.67E-05 | 0.000532   |
| map01210 | 2-Oxocarboxylic acid metabolism                            | 3.32E-05 | 0.000963   |
| map00830 | Retinol metabolism                                         | 6.14E-05 | 0.001576   |
| map00052 | Galactose metabolism                                       | 6.98E-05 | 0.001576   |
| map01040 | Biosynthesis of unsaturated fatty acids                    | 7.42E-05 | 0.001576   |
| map01200 | Carbon metabolism                                          | 7.49E-05 | 0.001576   |
| map00592 | alpha-Linolenic acid metabolism                            | 8.01E-05 | 0.001576   |
| map00380 | Tryptophan metabolism                                      | 0.000418 | 0.006662   |
| map00960 | Tropane, piperidine and pyridine alkaloid biosynthesis     | 0.000469 | 0.007119   |
| map00270 | Cysteine and methionine metabolism                         | 0.000639 | 0.009268   |
| map05120 | Epithelial cell signaling in Helicobacter pylori infection | 0.000978 | 0.012995   |
| map00600 | Sphingolipid metabolism                                    | 0.001218 | 0.014945   |
| map00500 | Starch and sucrose metabolism                              | 0.001318 | 0.015574   |
| map04614 | Renin-angiotensin system                                   | 0.00143  | 0.015985   |
| map00130 | Ubiquinone and other terpenoid-quinone biosynthesis        | 0.001521 | 0.016024   |
| map00401 | Novobiocin biosynthesis                                    | 0.001752 | 0.016486   |
| map04721 | Synaptic vesicle cycle                                     | 0.001809 | 0.016486   |
| map00970 | Aminoacyl-tRNA biosynthesis                                | 0.001809 | 0.016486   |
| map00250 | Alanine, aspartate and glutamate metabolism                | 0.002368 | 0.020417   |
| map00950 | Isoquinoline alkaloid biosynthesis                         | 0.002767 | 0.023229   |
| map00280 | Valine, leucine and isoleucine degradation                 | 0.003385 | 0.026763   |
| map00400 | Phenylalanine, tyrosine and tryptophan biosynthesis        | 0.003457 | 0.026763   |
| map00330 | Arginine and proline metabolism                            | 0.003476 | 0.026763   |
| map00920 | Sulfur metabolism                                          | 0.005238 | 0.037133   |
| map00591 | Linoleic acid metabolism                                   | 0.007294 | 0.049504   |

**Table S37 The accession numbers and IDs of the genes displayed in Figure 5d.**

*See the separate Excel file.*

## References

1. Dolezel, J., Bartos, J., Voglmayr, H., Greilhuber, J. Nuclear DNA content and genome size of trout and human. *Cytom. Part A*. **51**, 127-128 (2013).
2. Saitou, N. & Nei, M. The neighbor-joining method: a new method for reconstructing phylogenetic trees. *Mol. Biol. Evol.* **4**, 406-425 (1987).
3. Nei, M. & Kumar, S. Molecular evolution and phylogenetics. *Heredity* **86**, 385-385 (2001).
4. Felsenstein, J. Confidence limits on phylogenies: an approach using the bootstrap. *Evolution* **39**: 783-791 (1985).
5. Thompson, J. D., Gibson, T. J. & Higgins, D.G. Multiple sequence alignment using ClustalW and ClustalX. *Curr. Protoc. Bioinformatics* **Ch. 2**: Unit 2.2-3 (2002)
6. Zhang, X., *et al.* The sea cucumber genome provides insights into morphological evolution and visceral regeneration. *PLoS Biol.* **15**, e2003790 (2017).
7. Jo, J., *et al.* Draft genome of the sea cucumber *Apostichopus japonicus* and genetic polymorphism among color variants. *Gigascience* **6**, 1-6 (2017).
